# Supplementary material for: Dynamic Changes in Egg Quality, Heritability and Correlation of These Traits and Yolk Nutrient throughout the Entire Laying Cycle
Source: Foods. 2023 Dec 14;12(24):4472. doi: 10.3390/foods12244472 (PMC10742422; doi:10.3390/foods12244472)
Supplement: Supplementary file 1 [file foods-12-04472-s001.zip]

Archive with 4 entries (4 files):
- Figure S1. The correlation of the egg qualities at different weeks.tif
- Supplementary S1.pdf
- Table S1.The EW, YW and PY of chosen chickens at different weeks.xlsx
- Table S2. The pedigree and phenotype of hens.xlsx
