# Supplementary material for: Dynamic Changes in Egg Quality, Heritability and Correlation of These Traits and Yolk Nutrient throughout the Entire Laying Cycle
Source: Foods. 2023 Dec 14;12(24):4472. doi: 10.3390/foods12244472 (PMC10742422; doi:10.3390/foods12244472)
Supplement: Supplementary file 1 [file foods-12-04472-s001.zip › Table S1.The EW, YW and PY of chosen chickens at different weeks.xlsx]

## Sheet: 33 week
	EGG 1			EGG 2			EGG 3
	EW(g)	YW(g)	PY	EW(g)	YW(g)	PY	EW(g)	YW(g)	PY
1	40.9	14.5	0.354523	41.2	14.7	0.356796	40.2	13.9	0.345771
2	46.9	16.2	0.345416	47	16	0.340426	46.2	15.5	0.335498
3	48	16.1	0.335417	49.3	16.6	0.336714	48.1	16.2	0.336798
4	40.9	13.5	0.330073	40.5	13.1	0.323457	39.8	13.3	0.334171
5	41.9	13.6	0.324582	42	13.8	0.328571	42.6	14	0.328638
6	46.6	10.8	0.23176	45.5	11	0.241758	53.4	12	0.224719
7	52.4	12.6	0.240458	57.1	13.9	0.243433	53.4	13.4	0.250936
8	46.3	11.6	0.25054	49.4	12.3	0.248988	50.2	12.2	0.243028
9	50.8	12	0.23622	50.9	13	0.255403	48.5	12.6	0.259794
10	46.3	11.5	0.24838	52.4	13	0.248092	52.5	13.4	0.255238
	high percentage of yolk
	low percentage of yolk

## Sheet: 43 week
	EGG 1			EGG 2			EGG 3
	EW(g)	YW(g)	PY	EW(g)	YW(g)	PY	EW(g)	YW(g)	PY
1	46.4	15.46	0.33319	45.2	15.94	0.352655	44.7	16.53	0.369799
2	44.7	15.53	0.347427	43.8	15.25	0.348174	44.8	16.08	0.358929
3	49	17.19	0.350816	47	16.38	0.348511	43.7	14.7	0.336384
4	46.8	16	0.34188	46.9	16.21	0.345629	46.6	16.1	0.345494
5	45.8	15.25	0.332969	45.4	15.46	0.340529	45.4	15.59	0.343392
6	48.8	13.08	0.268033	51.5	15.27	0.296505	50.9	14.59	0.28664
7	47.3	12.96	0.273996	50.4	13.47	0.267262	53.7	14.61	0.272067
8	50.4	13.79	0.273611	50.1	13.63	0.272056	52.8	14.71	0.278598
9	49.9	12.84	0.257315	56	14.65	0.261607	52.4	14.59	0.278435
10	52.6	13.44	0.255513	52.5	13.6	0.259048	51.8	14.14	0.272973
	high percentage of yolk
	low percentage of yolk

## Sheet: 53 week
	EGG 1			EGG 2			EGG 3
	EW(g)	YW(g)	PY	EW(g)	YW(g)	PY	EW(g)	YW(g)	PY
1	49.85	16.6	0.33302	50.4	17.23	0.341865	50.9	16.64	0.326916
2	44.3	14.7	0.331828	44.8	15.12	0.3375	45.2	15.05	0.332965
3	47.9	16.5	0.344468	46.5	15.43	0.331828	47.6	16.14	0.339076
4	50	17.7	0.354	50.7	18.08	0.356607	51.8	17.93	0.346139
5	47.9	17.5	0.365344	43.5	15.38	0.353563	44.2	16.3	0.368778
6	51.6	14.2	0.275194	51.4	14.28	0.277821	51.3	13.94	0.271735
7	46.4	12.9	0.278017	45.3	13.03	0.287638	46.3	13.09	0.282721
8	45.1	12.7	0.281596	47.2	13.56	0.287288	45.9	13.67	0.297821
9	47.8	14	0.292887	47	13.48	0.286809	47	13.62	0.289787
10	52.2	15.1	0.289272	51.9	15.01	0.28921	52	15.34	0.295
	high percentage of yolk
	low percentage of yolk
