# Supplementary material for: Dynamic Changes in Egg Quality, Heritability and Correlation of These Traits and Yolk Nutrient throughout the Entire Laying Cycle
Source: Foods. 2023 Dec 14;12(24):4472. doi: 10.3390/foods12244472 (PMC10742422; doi:10.3390/foods12244472)
Supplement: Supplementary file 1 [file foods-12-04472-s001.zip › Table S2. The pedigree and phenotype of hens.xlsx]

## Sheet: pedigree
ID	father	mother
D1-2	9	2
D1-4	7	4
D1-5	7	6
D1-9	1	8
D1-10	22	9
D1-11	23	6
D1-13	20	12
D1-16	7	1
D1-21	8	7
D1-22	7	4
D1-23	1	11
D1-25	2	6
D1-29	1	5
D1-30	12	13
D1-35	1	10
D1-37	2	6
D1-38	2	7
D1-41	6	3
D1-43	27	2
D1-44	1	13
D1-46	8	12
D1-52	23	12
D1-53	6	6
D1-54	6	3
D1-56	1	8
D1-64	9	9
D1-65	3	3
D1-68	6	4
D1-71	8	12
D1-72	3	14
D1-73	1	1
D1-79	7	2
D1-81	1	12
D1-84	1	8
D1-88	1	5
D1-90	1	6
D1-91	9	7
D1-92	20	2
D1-95	14	14
D1-96	15	11
D1-103	7	1
D1-110	20	7
D1-116	19	7
D1-117	2	7
D1-119	12	13
D1-120	12	14
D1-121	3	3
D1-126	20	2
D1-128	1	6
D1-131	20	6
D1-132	1	7
D1-133	14	2
D1-136	20	11
D1-137	8	12
D1-138	1	11
D1-139	10	13
D1-140	2	3
D1-141	7	11
D1-142	1	13
D1-144	3	10
D1-145	28	7
D1-146	10	4
D1-147	20	6
D1-148	1	1
D1-151	2	11
D1-152	28	6
D1-153	24	11
D1-158	14	4
D1-159	14	4
D1-162	20	4
D1-163	2	12
D1-165	11	11
D1-172	3	6
D1-174	24	5
D2-3	24	11
D2-4	27	6
D2-15	8	14
D2-17	12	14
D2-19	10	4
D2-22	5	6
D2-26	5	6
D2-27	8	7
D2-29	1	13
D2-35	23	11
D2-36	22	10
D2-40	9	2
D2-43	7	11
D2-45	1	10
D2-46	6	9
D2-48	6	2
D2-50	7	10
D2-51	20	4
D2-53	7	2
D2-54	0	0
D2-57	8	10
D2-59	22	13
D2-61	5	6
D2-62	10	1
D2-66	6	6
D2-67	6	13
D2-68	19	9
D2-72	7	2
D2-73	20	6
D2-74	6	4
D2-81	23	6
D2-85	24	13
D2-86	1	3
D2-87	10	4
D2-89	8	12
D2-90	8	10
D2-92	27	8
D2-94	6	6
D2-95	7	14
D2-96	1	10
D2-99	2	7
D2-101	19	5
D2-103	23	5
D2-105	12	8
D2-106	22	12
D2-107	7	1
D2-108	5	6
D2-109	10	4
D2-113	2	7
D2-116	12	10
D2-117	10	13
D2-118	12	13
D2-120	8	13
D2-123	11	6
D2-124	20	5
D2-127	23	6
D2-131	19	10
D2-134	20	3
D2-135	15	8
D2-139	12	8
D2-141	8	9
D2-144	5	6
D2-146	1	3
D2-149	10	7
D2-151	12	4
D2-155	11	11
D2-157	2	7
D2-158	20	13
D2-160	7	10
D2-163	8	13
D2-166	14	2
D2-167	10	6
D2-169	6	7
D2-173	14	7
D2-174	20	3
D2-176	1	6
D2-179	12	8
D3-2	12	8
D3-4	23	12
D3-5	19	14
D3-9	10	6
D3-12	8	12
D3-14	2	7
D3-15	20	12
D3-17	15	8
D3-19	11	6
D3-20	19	14
D3-21	27	2
D3-25	3	4
D3-27	6	4
D3-31	2	13
D3-36	6	4
D3-38	7	14
D3-39	7	13
D3-41	11	10
D3-42	27	2
D3-49	8	12
D3-58	19	3
D3-59	12	13
D3-64	3	11
D3-66	6	4
D3-67	23	8
D3-71	10	6
D3-77	23	11
D3-81	12	14
D3-86	3	11
D3-89	27	3
D3-93	3	11
D3-102	10	6
D3-103	28	5
D3-106	12	10
D3-108	12	6
D3-110	15	8
D3-111	5	12
D3-113	2	6
D3-119	6	4
D3-126	27	9
D3-127	11	1
D3-128	22	9
D3-130	19	14
D3-131	8	7
D3-136	11	11
D3-140	7	4
D3-141	22	3
D3-144	14	4
D3-147	9	7
D3-148	6	4
D3-150	22	12
D3-156	20	4
D3-157	15	8
D3-158	23	2
D3-160	9	7
D3-161	9	7
D3-163	12	14
D3-164	7	4
D3-166	11	10
D3-167	19	14
D3-171	22	10
D3-175	6	4
D3-177	3	4
D3-179	23	2
D3-180	6	2
E1-1	0	0
E1-5	12	6
E1-8	1	12
E1-10	11	1
E1-13	28	10
E1-17	12	14
E1-18	5	2
E1-19	7	11
E1-21	10	11
E1-25	10	12
E1-28	28	5
E1-29	20	3
E1-32	10	6
E1-34	12	11
E1-37	11	10
E1-39	3	14
E1-41	20	2
E1-43	14	2
E1-52	3	4
E1-55	14	10
E1-62	20	7
E1-63	28	5
E1-66	20	3
E1-67	19	14
E1-69	12	7
E1-80	15	4
E1-81	22	6
E1-86	12	10
E1-90	7	2
E1-91	1	5
E1-92	1	13
E1-95	19	7
E1-98	23	1
E1-100	3	6
E1-102	22	13
E1-105	15	4
E1-109	7	13
E1-111	8	9
E1-112	33	7
E1-117	5	13
E1-122	11	6
E1-123	19	9
E1-124	20	14
E1-125	23	1
E1-126	8	9
E1-131	20	3
E1-133	8	10
E1-135	0	0
E1-140	5	4
E1-141	27	5
E1-145	28	10
E1-150	8	12
E1-151	15	13
E1-154	9	6
E1-158	11	1
E1-161	3	4
E1-162	19	11
E1-164	27	9
E1-165	28	8
E1-167	0	0
E1-169	6	11
E1-171	12	6
E1-178	3	6
E1-180	12	7
E2-8	14	10
E2-9	7	6
E2-24	1	6
E2-34	5	4
E2-36	10	13
E2-38	14	2
E2-39	20	13
E2-41	20	6
E2-48	14	5
E2-58	15	8
E2-59	12	4
E2-66	9	2
E2-68	24	9
E2-69	15	13
E2-74	2	13
E2-75	3	2
E2-76	27	6
E2-80	20	5
E2-81	20	12
E2-86	12	10
E2-87	7	4
E2-90	12	8
E2-91	12	7
E2-94	22	5
E2-97	7	11
E2-98	19	14
E2-99	27	6
E2-101	22	2
E2-107	22	14
E2-113	23	8
E2-114	7	11
E2-115	24	13
E2-120	1	3
E2-125	6	2
E2-127	10	7
E2-131	20	4
E2-135	12	13
E2-136	8	10
E2-138	7	11
E2-139	7	14
E2-140	12	6
E2-146	5	11
E2-150	0	0
E2-151	7	2
E2-154	0	0
E2-156	22	9
E2-157	3	10
E2-162	22	13
E2-163	7	13
E2-168	22	12
E2-171	15	4
E2-172	23	8
E2-173	19	7
E2-176	19	5
E2-178	7	2
E3-4	10	6
E3-8	22	8
E3-11	22	3
E3-12	28	10
E3-13	22	7
E3-17	23	1
E3-28	19	9
E3-30	10	11
E3-31	23	8
E3-32	7	11
E3-35	27	2
E3-36	24	13
E3-37	19	14
E3-41	23	1
E3-43	12	14
E3-45	23	1
E3-46	12	7
E3-50	23	5
E3-51	23	8
E3-52	5	12
E3-54	11	1
E3-60	15	11
E3-61	22	3
E3-62	23	5
E3-75	20	5
E3-81	28	6
E3-82	6	3
E3-83	7	10
E3-85	2	7
E3-86	10	1
E3-87	8	10
E3-90	23	12
E3-98	7	4
E3-101	22	5
E3-102	24	9
E3-104	22	9
E3-106	9	2
E3-110	2	7
E3-115	24	13
E3-121	2	1
E3-122	28	5
E3-130	10	6
E3-131	23	12
E3-132	22	9
F1-3	20	6
F1-5	12	10
F1-6	20	2
F1-11	15	4
F1-12	19	11
F1-14	6	2
F1-18	3	14
F1-21	9	7
F1-30	14	7
F1-36	24	9
F1-43	6	2
F1-44	10	3
F1-49	11	14
F1-54	9	11
F1-56	19	11
F1-57	2	12
F1-63	6	2
F1-64	5	2
F1-66	1	8
F1-67	3	3
F1-73	5	2
F1-74	10	12
F1-76	15	4
F1-78	5	4
F1-80	15	13
F1-82	10	12
F1-83	22	8
F1-84	1	6
F1-86	1	6
F1-96	10	12
F1-111	14	14
F1-119	22	5
F1-122	10	12
F1-123	14	2
F1-129	10	12
F1-130	9	7
F1-135	10	3
F1-141	0	0
F1-147	14	14
F1-152	10	7
F1-155	14	2
F1-157	14	2
F1-158	22	8
F1-159	22	6
F1-161	14	7
F1-163	22	2
F1-164	14	14
F1-165	5	13
F1-168	14	2
F1-171	15	4
F1-174	28	5
F1-175	14	2
F1-177	1	8
F1-178	7	6
F2-1	28	8
F2-2	14	5
F2-4	15	12
F2-8	14	2
F2-9	27	11
F2-16	14	4
F2-17	5	2
F2-22	6	13
F2-30	14	4
F2-34	22	13
F2-35	10	4
F2-41	0	0
F2-43	10	3
F2-47	5	12
F2-53	2	12
F2-56	24	13
F2-60	27	9
F2-61	3	11
F2-62	27	3
F2-63	19	3
F2-64	3	6
F2-65	11	12
F2-76	10	4
F2-77	20	12
F2-78	11	6
F2-81	10	3
F2-82	23	5
F2-90	3	12
F2-93	24	11
F2-100	20	7
F2-101	6	4
F2-103	1	10
F2-106	19	9
F2-109	28	7
F2-110	28	8
F2-111	22	7
F2-116	3	11
F2-117	5	4
F2-118	7	2
F2-123	24	11
F2-128	11	1
F2-136	0	0
F2-139	11	6
F2-140	22	3
F2-149	22	5
F2-150	19	9
F2-153	5	12
F2-160	3	3
F2-165	7	13
F2-167	14	7
F2-168	28	5
F2-169	15	4
F2-173	6	11
F2-177	15	4
F2-179	11	6
F2-180	5	2
F3-1	11	12
F3-3	20	5
F3-7	20	12
F3-13	6	7
F3-15	19	3
F3-16	10	6
F3-17	15	12
F3-22	20	7
F3-26	7	10
F3-27	14	4
F3-31	1	11
F3-32	19	5
F3-34	22	8
F3-37	20	4
F3-38	20	6
F3-41	7	10
F3-43	11	9
F3-44	11	9
F3-45	23	2
F3-47	28	12
F3-50	27	8
F3-52	10	6
F3-56	6	5
F3-57	9	2
F3-58	10	13
F3-64	0	0
F3-65	5	13
F3-67	15	12
F3-70	11	10
F3-71	15	13
F3-81	22	12
F3-84	20	11
F3-89	2	5
F3-96	0	0
F3-99	1	6
F3-100	1	6
F3-103	15	13
F3-104	3	6
F3-108	11	6
F3-110	28	6
F3-111	15	4
F3-136	19	14

## Sheet: 33 week phenotype
id	a1	a2	a3	a4	a5	a6	a7	a8		a1	EW
D1-9	41.1	13.7	0.333333	4.24	0.103163	3.585	0.300333	1.34211		a2	YW
D1-25	49.1	15.3	0.311609	5.35	0.108961	2.838	0.315	1.325		a3	PY
D1-43	43.5	12.3	0.282759	4.64	0.106667	3.722	0.314667	1.39474		a4	ESW
D1-46	43.3	14.2	0.327945	4.68	0.108083	3.287	0.321667	1.39474		a5	PSW
D1-52	48	13.6	0.283333	5.02	0.104583	3.503	0.329667	1.3		a6	ESS
D1-64	42.5	12.1	0.284706	4.36	0.102588	3.935	0.296333	1.36842		a7	EST
D1-68	47.6	15.8	0.331933	5.29	0.111134	3.766	0.343	1.275		a8	ESI
D1-84	47.6	14.2	0.298319	4.67	0.0981092	2.709	0.307	1.41026
D1-90	47.5	15.1	0.317895	4.84	0.101895	3.799	0.314	1.41026
D1-91	42.7	12.9	0.302108	4.58	0.10726	3.943	0.321667	1.36842
D1-110	45.2	13	0.287611	4.96	0.109735	3.62	0.347333	1.33333
D1-116	39.9	13.7	0.343358	4.37	0.109524	3.374	0.308	1.35135
D1-137	46.3	12.4	0.267819	4.65	0.100432	2.884	0.310333	1.41026
D1-141	45.6	10.6	0.232456	4.62	0.101316	3.784	0.305333	1.33333
D1-144	45.4	15.3	0.337004	5.28	0.1163	5.024	0.331667	1.38462
D1-146	43.2	13.5	0.3125	4.76	0.110185	4.183	0.337667	1.45946
D1-158	53.4	13.7	0.256554	5.73	0.107303	3.396	0.351667	1.45
D1-162	43.4	13.9	0.320276	4.6	0.105991	3.464	0.317	1.36842
D2-4	43.2	11.1	0.256944	5.03	0.116435	3.707	0.336	1.28205
D2-43	46.4	12.5	0.269397	5.11	0.110129	3.991	0.314333	1.275
D2-48	42.4	13.5	0.318396	5.26	0.124057	2.982	0.356	1.28205
D2-50	45.3	12.6	0.278146	5.15	0.113687	3.955	0.326667	1.30769
D2-54	44.4	13.2	0.297297	6.04	0.136036	3.53	0.321667	1.33333
D2-62	40.4	12.5	0.309406	4.75	0.117574	3.488	0.335	1.47222
D2-72	49.7	13	0.261569	5.08	0.102213	3.98	0.305667	1.26829
D2-73	40.4	11.7	0.289604	4.4	0.108911	3.196	0.310333	1.37838
D2-86	44.8	13.8	0.308036	4.46	0.0995536	3.324	0.289667	1.25
D2-95	44.5	11	0.247191	5.11	0.114831	4.796	0.324333	1.33333
D2-101	40.2	12.8	0.318408	4.36	0.108458	3.767	0.302333	1.31579
D2-106	48.8	15.5	0.317623	4.8	0.0983607	3.694	0.300667	1.375
D2-109	40.9	11.4	0.278729	4.64	0.113447	4.539	0.334667	1.44444
D2-113	43	11.9	0.276744	4.17	0.0969767	3.518	0.292	1.28205
D2-117	40.3	13.1	0.325062	4.61	0.114392	3.691	0.336333	1.57143
D2-120	46.5	14.1	0.303226	4.7	0.101075	3.271	0.313333	1.3
D2-127	43.9	12.8	0.291572	5.02	0.114351	3.94	0.326667	1.39474
D2-134	39.8	13.2	0.331658	4.47	0.112312	4.631	0.323333	1.28947
D2-141	47.7	13.9	0.291405	5.36	0.112369	3.364	0.330667	1.3
D2-146	42.4	12.6	0.29717	4.07	0.0959906	3.198	0.284333	1.28205
D2-166	49.5	16.7	0.337374	5.3	0.107071	3.979	0.325667	1.26829
D2-174	44.2	14.2	0.321267	4.73	0.107014	4.83	0.311667	1.39474
D2-176	49.3	15.9	0.322515	4.39	0.0890467	3.468	0.283	1.4359
D3-5	46.1	14.7	0.318872	4.68	0.101518	2.929	0.317667	1.35897
D3-9	42.3	12	0.283688	4.4	0.104019	3.842	0.313667	1.34211
D3-15	42.9	11.8	0.275058	4.24	0.0988345	2.938	0.279333	1.36842
D3-17	43.2	14	0.324074	4.14	0.0958333	3.264	0.276667	1.30769
D3-20	45.3	14.6	0.322296	5.24	0.115673	4.414	0.341667	1.33333
D3-27	45.8	14	0.305677	5.45	0.118996	3.627	0.323	1.3
D3-31	48.3	15.7	0.325052	5.24	0.108489	3.231	0.310667	1.46154
D3-36	43.8	14	0.319635	5.08	0.115982	4.733	0.341667	1.28205
D3-41	46.8	13.1	0.279915	5.05	0.107906	4.107	0.324333	1.41026
D3-42	53	13.4	0.25283	4.87	0.0918868	3.124	0.272667	1.31707
D3-59	48.8	15.6	0.319672	5.25	0.107582	3.197	0.342	1.325
D3-64	42.6	11.1	0.260563	3.52	0.0826291	2.254	0.239	1.35135
D3-66	51	15.6	0.305882	5.63	0.110392	5.091	0.346333	1.26829
D3-71	45.3	13.1	0.289183	5.13	0.113245	4.05	0.355	1.30769
D3-77	44.7	13.4	0.299776	4.96	0.110962	3.409	0.319	1.25
D3-81	50.4	15	0.297619	5.41	0.107341	3.814	0.333	1.375
D3-86	45.4	14.2	0.312775	4.9	0.10793	4.159	0.326667	1.36842
D3-93	38.9	12.6	0.323907	3.98	0.102314	3.227	0.277	1.36111
D3-102	63.3	13.1	0.206951	4.51	0.071248	3.832	0.296	1.35897
D3-108	54.3	14.5	0.267035	5.69	0.104788	3.72	0.316	1.39024
D3-110	42.6	12.2	0.286385	4.29	0.100704	3.661	0.29	1.28205
D3-111	54	15	0.277778	5.48	0.101481	3.638	0.328	1.34146
D3-119	45.2	14.1	0.311947	4.88	0.107965	3.874	0.319667	1.275
D3-127	50.8	15.3	0.301181	5.15	0.101378	3.805	0.307333	1.29268
D3-128	47.9	13.6	0.283925	5.06	0.105637	4.068	0.328	1.2439
D3-130	41.7	13	0.311751	4.82	0.115588	4.492	0.330333	1.31579
D3-140	44.6	12.8	0.286996	4.8	0.107623	4.566	0.316333	1.51351
D3-141	47.1	13.8	0.292994	4.09	0.0868365	2.354	0.263667	1.35
D3-147	50.7	14.6	0.287968	5.45	0.107495	4.518	0.325667	1.375
D3-148	41	12.8	0.312195	4.37	0.106585	3.279	0.306333	1.31579
D3-160	42.7	12.8	0.299766	4.7	0.11007	3.472	0.322333	1.31579
D3-164	40.2	12.3	0.30597	4.71	0.117164	4.177	0.325667	1.35135
D3-166	49.4	14.9	0.301619	4.74	0.0959514	3.764	0.309	1.375
D3-167	46.9	13.8	0.294243	4.58	0.0976546	2.455	0.289	1.325
D3-177	42.4	15.2	0.358491	4.8	0.113208	4.07	0.315	1.31579
D3-179	48.9	15.1	0.308793	4.73	0.096728	3.637	0.289	1.375
E1-1	44.9	12.7	0.282851	5.6	0.124722	5.068	0.374	1.33333
E1-18	46.9	13.2	0.28145	5.78	0.123241	4.626	0.371667	1.38462
E1-21	45.7	13.5	0.295405	5.14	0.112473	5.411	0.349	1.35897
E1-28	47.7	13.2	0.27673	5.39	0.112998	5.317	0.348	1.325
E1-32	46.9	11.8	0.251599	5.49	0.117058	3.83	0.357333	1.35897
E1-39	45.7	14.3	0.31291	4.99	0.10919	4.019	0.304	1.33333
E1-41	44.4	13.5	0.304054	4.96	0.111712	3.8	0.311	1.39474
E1-55	50.9	12.2	0.239686	5.14	0.100982	3.683	0.313333	1.31707
E1-69	54.2	15.2	0.280443	5.69	0.104982	2.922	0.330667	1.34146
E1-80	49.8	13.4	0.269076	5.44	0.109237	3.179	0.339333	1.3
E1-86	52.3	13.9	0.265774	5.31	0.10153	4.673	0.327333	1.34146
E1-90	43.5	12.7	0.291954	4.64	0.106667	3.636	0.313333	1.36842
E1-91	44.2	13.7	0.309955	4.21	0.0952489	3.153	0.286	1.39474
E1-95	39.7	11.9	0.299748	4.59	0.115617	1.802	0.332667	1.35135
E1-98	44.6	13.5	0.302691	5.19	0.116368	4.513	0.341333	1.35897
E1-102	47.3	13.6	0.287526	5.26	0.111205	4.092	0.342	1.3
E1-105	43.3	12	0.277136	4.85	0.112009	3.853	0.317667	1.34211
E1-111	51.6	15.7	0.304264	6.04	0.117054	3.656	0.348667	1.29268
E1-112	40.2	11.7	0.291045	4.69	0.116667	3.367	0.318667	1.44444
E1-122	43.9	14.2	0.323462	4.66	0.10615	3.88	0.296333	1.25
E1-124	44.2	13.2	0.298643	4.76	0.107692	3.307	0.294333	1.39474
E1-126	49.4	13.5	0.273279	5.67	0.114777	4.268	0.345333	1.275
E1-131	46.3	13.2	0.285097	5.53	0.119438	3.531	0.358667	1.42105
E1-135	48.2	12.9	0.267635	5.05	0.104772	3.779	0.319333	1.325
E1-150	42.8	12.2	0.285047	4.62	0.107944	3.449	0.321	1.36842
E1-158	53.4	15.3	0.286517	5.03	0.0941948	3.499	0.306	1.31707
E1-165	43.8	12.5	0.285388	4.84	0.110502	4.066	0.334	1.28205
E1-167	52	14.4	0.276923	5.25	0.100962	3.023	0.312	1.34146
E1-171	55.5	13.5	0.243243	6.01	0.108288	3.121	0.350333	1.39024
E1-178	50.6	13.7	0.270751	5.57	0.110079	3.96	0.322667	1.31707
E2-8	52	14	0.269231	4.57	0.0878846	3.101	0.263333	1.34146
E2-9	51.8	12.6	0.243243	5.25	0.101351	2.809	0.318667	1.31707
E2-36	46.4	11.4	0.24569	4.8	0.103448	3.286	0.307667	1.38462
E2-41	46.2	13	0.281385	5.08	0.109957	4.151	0.312667	1.3
E2-58	45.7	12.1	0.26477	4.63	0.101313	4.207	0.301333	1.33333
E2-69	48.9	13.8	0.282209	5.68	0.116155	4.089	0.340333	1.35
E2-81	40.9	11.4	0.278729	4.83	0.118093	4.125	0.335667	1.28947
E2-87	43.7	12.1	0.276888	5.26	0.120366	5.036	0.354667	1.30769
E2-91	50	12.8	0.256	5.24	0.1048	3.196	0.330667	1.35
E2-94	42	12.3	0.292857	4.72	0.112381	3.99	0.332	1.31579
E2-97	50.3	13.5	0.26839	4.91	0.0976143	3.569	0.296667	1.375
E2-99	57	12.8	0.224561	5.92	0.10386	3.29	0.339333	1.39024
E2-107	48.8	12.9	0.264344	5.06	0.103689	2.786	0.298	1.35
E2-113	52.1	12.7	0.243762	6.14	0.11785	4.282	0.36	1.34146
E2-114	46.7	12.5	0.267666	5.11	0.109422	3.379	0.312333	1.38462
E2-115	51.5	14	0.271845	5.52	0.107184	4.057	0.336	1.29268
E2-127	48.2	13.7	0.284232	5.3	0.109959	3.78	0.332333	1.3
E2-139	48.2	12.4	0.257261	5.29	0.109751	3.618	0.315333	1.325
E2-140	48.9	14.2	0.290389	5.16	0.105521	3.164	0.313333	1.35
E2-157	45.2	12.9	0.285398	4.81	0.106416	3.541	0.298667	1.33333
E2-172	48.5	12.3	0.253608	5.79	0.119381	4.577	0.361667	1.275
E2-176	51.2	16	0.3125	5.12	0.1	3.806	0.305333	1.35
E3-4	45.2	13.5	0.298673	4.72	0.104425	3.825	0.308667	1.33333
E3-13	41.5	12	0.289157	4.68	0.112771	4.157	0.330333	1.34211
E3-32	46.1	11.6	0.251627	5.28	0.114534	3.535	0.328333	1.33333
E3-35	47.3	13.9	0.293869	5.2	0.109937	3.313	0.308	1.35897
E3-43	46.8	13	0.277778	5.08	0.108547	4.256	0.324333	1.25
E3-46	56.1	14.5	0.258467	5.4	0.0962567	3.153	0.306667	1.36585
E3-60	44.7	12.7	0.284116	4.91	0.109843	3.805	0.314667	1.25
E3-75	47.5	13.6	0.286316	5.06	0.106526	3.65	0.307333	1.46154
E3-81	48.9	12.6	0.257669	5.25	0.107362	4.076	0.323	1.35
E3-82	47.3	12.7	0.268499	5.44	0.115011	4.88	0.338333	1.25
E3-83	46.1	12.8	0.277657	4.84	0.104989	3.265	0.308	1.35897
E3-87	45.4	14.1	0.310573	4.72	0.103965	2.658	0.298	1.3
E3-102	44.1	14.5	0.328798	4.4	0.0997732	3.174	0.272667	1.33333
E3-104	45	10.8	0.24	5.08	0.112889	3.917	0.342333	1.25
E3-106	49	12.8	0.261224	5.3	0.108163	4.689	0.339333	1.375
E3-115	50.9	14.8	0.290766	5.88	0.115521	3.085	0.296667	1.34146
E3-121	48.5	13.7	0.282474	5.3	0.109278	2.761	0.329333	1.325
E3-130	41.2	14.1	0.342233	4.74	0.115049	3.857	0.328333	1.19444
E3-131	51	14.1	0.276471	5.86	0.114902	3.814	0.336333	1.35
F1-3	45.7	13.8	0.301969	5.2	0.113786	3.674	0.325667	1.38462
F1-5	49.2	14.5	0.294715	5.24	0.106504	4.199	0.330333	1.325
F1-18	46.3	14.5	0.313175	4.78	0.10324	3.053	0.278667	1.38462
F1-43	44.2	12.5	0.282805	5.13	0.116063	2.598	0.344333	1.30769
F1-44	39.3	11.1	0.282443	3.85	0.0979644	3.645	0.309667	1.44444
F1-49	52.9	17.6	0.332703	5.46	0.103214	4.106	0.312333	1.34146
F1-56	42.7	13.1	0.306792	4.78	0.111944	4.11	0.313667	1.34211
F1-66	44.6	13.6	0.304933	4.79	0.107399	3.935	0.313	1.39474
F1-82	39.2	12.1	0.308673	3.68	0.0938776	2.843	0.268333	1.41667
F1-86	42.9	14.1	0.328671	4.4	0.102564	3.153	0.275667	1.36842
F1-111	48.5	12.6	0.259794	4.98	0.10268	4.374	0.301667	1.3
F1-141	44	13.7	0.311364	4.91	0.111591	4.361	0.311333	1.39474
F1-147	51.2	14.6	0.285156	5.61	0.10957	4.291	0.339	1.275
F1-155	45.8	13.2	0.28821	4.75	0.103712	3.685	0.309667	1.38462
F1-158	52.5	16	0.304762	5.29	0.100762	4.418	0.295667	1.34146
F1-164	45.1	11	0.243902	4.56	0.101109	3.578	0.299	1.33333
F1-171	46.1	11.3	0.245119	4.52	0.0980477	3.233	0.287	1.275
F2-9	46.3	11.9	0.257019	4.77	0.103024	3.414	0.313333	1.25
F2-43	44.9	12.2	0.271715	4.18	0.0930958	3.558	0.289333	1.33333
F2-47	53.2	13.9	0.261278	5.37	0.10094	4.131	0.297333	1.34146
F2-53	49.9	14.1	0.282565	5.12	0.102605	2.543	0.292	1.4359
F2-56	49.5	13.4	0.270707	5.82	0.117576	4.335	0.337667	1.4
F2-62	47.4	13.5	0.28481	5.23	0.110338	3.708	0.328	1.41026
F2-76	47.5	13	0.273684	4.87	0.102526	4.22	0.308667	1.44737
F2-90	47.9	14	0.292276	4.56	0.0951983	3.959	0.286333	1.4359
F2-100	42.7	13.6	0.318501	4.88	0.114286	3.963	0.331	1.39474
F2-101	43.5	14	0.321839	5.03	0.115632	3.925	0.327333	1.30769
F2-106	43.8	14.3	0.326484	5.14	0.117352	4.1	0.327	1.34211
F2-110	43.8	11.5	0.262557	4.26	0.0972603	3.229	0.269333	1.275
F2-111	40.8	11.9	0.291667	4.43	0.108578	3.569	0.303333	1.31579
F2-123	52.2	14.9	0.285441	5.14	0.0984674	3.715	0.297333	1.45
F2-140	55.2	14.9	0.269928	5.47	0.0990942	3.358	0.310333	1.39024
F2-149	49.5	14.4	0.290909	5.44	0.109899	4.083	0.331333	1.26829
F2-150	45	14.9	0.331111	4.8	0.106667	2.945	0.306	1.38462
F2-153	52.6	14.4	0.273764	5.11	0.0971483	3.346	0.288333	1.53846
F2-167	46.3	12.8	0.276458	4.87	0.105184	4.094	0.307667	1.25
F2-173	50.2	13	0.258964	5.21	0.103785	2.346	0.313667	1.35
F2-177	51.3	12.6	0.245614	4.94	0.0962963	2.83	0.283333	1.34146
F2-179	43.5	13	0.298851	4.56	0.104828	3.235	0.292333	1.39474
F3-3	41.2	10.8	0.262136	4.39	0.106553	2.897	0.322667	1.31579
F3-7	42.2	12.4	0.293839	4.04	0.0957346	3.21	0.288333	1.39474
F3-13	48.8	13.6	0.278689	5.57	0.114139	3.385	0.335333	1.325
F3-15	46.4	14.3	0.30819	4.94	0.106466	3.835	0.335	1.35897
F3-17	51.5	12.8	0.248544	5.48	0.106408	3.757	0.331	1.375
F3-26	52.9	13.7	0.258979	5.52	0.104348	3.827	0.329667	1.425
F3-34	46.2	12.5	0.270563	4.46	0.0965368	3.295	0.294667	1.35897
F3-38	39.9	11.2	0.280702	4.25	0.106516	2.933	0.295	1.35135
F3-41	44.6	10.7	0.23991	3.65	0.0818386	1.723	0.241667	1.33333
F3-45	49.1	12.8	0.260692	5.29	0.107739	3.891	0.322667	1.375
F3-47	40.1	12.4	0.309227	4.2	0.104738	3.873	0.306	1.37838
F3-67	40.4	12.2	0.30198	4.32	0.106931	3.764	0.317	1.31579
F3-84	43	11.4	0.265116	4.87	0.113256	3.945	0.331	1.47222
F3-96	48.5	13.1	0.270103	4.86	0.100206	3.428	0.314667	1.375
F3-100	40.8	12.4	0.303922	3.91	0.0958333	2.789	0.277667	1.34211
F3-136	51.1	15	0.293542	5.52	0.108023	3.601	0.336	1.375
D1-5	46.9	13.8	0.294243	4.95	0.105544	1.182	0.312	1.47368
D1-16	46.1	13.2	0.286334	5.2	0.112798	3.687	0.343667	1.42105
D1-25	50.1	15.4	0.307385	5.46	0.108982	3.216	0.333333	1.35
D1-43	44.7	12.3	0.275168	4.95	0.110738	3.797	0.327	1.42105
D1-46	43.5	13.9	0.31954	5.06	0.116322	2.742	0.336333	1.45946
D1-51	47.8	13.9	0.290795	4.58	0.0958159	1.628	0.276	1.42105
D1-64	42.3	11.9	0.281324	4.52	0.106856	3.752	0.298667	1.34211
D1-68	47.4	15.9	0.335443	5.43	0.114557	4.1	0.35	1.275
D1-110	45.7	13.1	0.286652	5.07	0.110941	4.234	0.334333	1.28205
D1-116	40.6	14.5	0.357143	4.29	0.105665	3.067	0.300333	1.28947
D1-126	42.9	14.2	0.331002	4.68	0.109091	3.146	0.323	1.31579
D1-137	46.6	12.5	0.26824	5.14	0.1103	3.253	0.341667	1.42105
D1-147	42.1	13.3	0.315914	4.17	0.0990499	2.423	0.293667	1.28205
D1-158	55.1	13.9	0.252269	5.79	0.105082	3.436	0.346	1.375
D1-162	41.9	13.4	0.319809	4.46	0.106444	2.928	0.31	1.31579
D2-4	42.8	11.1	0.259346	5.09	0.118925	3.932	0.36	1.36842
D2-15	45.3	13.6	0.300221	4.87	0.107506	3.85	0.324333	1.33333
D2-29	45.1	14	0.310421	4.39	0.0973392	3.484	0.287333	1.44737
D2-40	44.6	14.4	0.32287	4.58	0.102691	4.052	0.315333	1.42105
D2-43	45.2	13.1	0.289823	4.79	0.105973	3.902	0.308	1.3
D2-48	41.5	13.9	0.33494	4.32	0.104096	2.667	0.302	1.34211
D2-50	46.9	13.6	0.289979	5.42	0.115565	3.476	0.34	1.35
D2-54	44.3	13.6	0.306998	4.53	0.102257	3.158	0.298	1.35897
D2-59	39.4	11.6	0.294416	5.01	0.127157	4.223	0.359	1.37838
D2-66	41.8	12.8	0.30622	4.54	0.108612	4.042	0.317	1.28205
D2-68	39.6	11.8	0.29798	3.73	0.0941919	3.026	0.260333	1.45946
D2-73	44.5	13.8	0.310112	4.75	0.106742	2.891	0.315667	1.47368
D2-86	44	13	0.295455	4.4	0.1	3.359	0.296667	1.42105
D2-89	47.4	12.1	0.255274	5.24	0.110549	3.81	0.333667	1.35
D2-95	45.3	10.9	0.240618	5.21	0.115011	3.909	0.337	1.42105
D2-101	42.7	14.4	0.337237	4.44	0.103981	3.151	0.308	1.34211
D2-106	47.5	15.7	0.330526	4.23	0.0890526	3.063	0.262333	1.41026
D2-109	41.3	11.9	0.288136	4.8	0.116223	3.732	0.349667	1.43243
D2-113	44.4	12	0.27027	4.65	0.10473	4.059	0.322	1.39474
D2-116	45.5	12.7	0.279121	4.53	0.0995604	4.352	0.318	1.3
D2-124	39.3	11.2	0.284987	3.93	0.1	2.479	0.275667	1.37838
D2-134	39.3	13.3	0.338422	4.54	0.115522	4.527	0.333	1.28947
D2-141	49.1	14.6	0.297352	5.37	0.109369	4.364	0.322	1.325
D2-146	43	12.8	0.297674	4.42	0.102791	4.054	0.327667	1.25641
D2-151	45.7	14.4	0.315098	4.32	0.0945295	3.741	0.3	1.275
D2-166	49.7	17.1	0.344064	5.16	0.103823	3.754	0.32	1.35
D2-174	44.9	14.6	0.325167	4.87	0.108463	3.973	0.332333	1.39474
D2-176	48	15.2	0.316667	4.24	0.0883333	3.349	0.264333	1.4359
D3-5	45.3	14.5	0.320088	4.79	0.10574	3.23	0.316	1.38462
D3-9	42.1	12.1	0.287411	4.53	0.107601	4.474	0.328667	1.34211
D3-15	43.1	11.7	0.271462	4.02	0.0932715	1.995	0.262	1.45946
D3-17	43.6	14.1	0.323394	3.87	0.0887615	2.892	0.29	1.33333
D3-19	42.9	14.6	0.340326	5.39	0.125641	3.513	0.318333	1.34146
D3-20	43.8	13.8	0.315068	5.22	0.119178	5.16	0.360667	1.36842
D3-27	45.5	15.1	0.331868	4.86	0.106813	3.555	0.313333	1.35897
D3-36	42.9	13.9	0.324009	5.14	0.119814	4.639	0.356333	1.28205
D3-42	51.7	12.9	0.249516	4.82	0.0932302	3.159	0.297	1.34146
D3-58	49.4	14.8	0.299595	5.4	0.109312	3.94	0.332	1.25
D3-59	48.4	15.7	0.32438	5.71	0.117975	3.314	0.342667	1.325
D3-64	38.5	11.3	0.293506	3.7	0.0961039	3.499	0.285667	1.35135
D3-66	50.9	16.2	0.318271	5.58	0.109627	4.65	0.35	1.31707
D3-71	44.6	13.1	0.293722	5.16	0.115695	4.706	0.354667	1.30769
D3-81	49.7	14	0.28169	5.47	0.11006	4.193	0.342	1.35
D3-93	39.9	12.5	0.313283	4.36	0.109273	3.818	0.300667	1.34211
D3-102	45.7	13.1	0.286652	4.53	0.0991247	3.962	0.304	1.325
D3-108	52.8	14.5	0.274621	5.59	0.105871	3.813	0.327333	1.34146
D3-119	46.6	14	0.300429	5.12	0.109871	4.791	0.331667	1.275
D3-128	48.3	13.9	0.287785	5.27	0.10911	3.892	0.34	1.375
D3-140	44	12.8	0.290909	4.88	0.110909	4.107	0.317333	1.47368
D3-144	48.6	14.1	0.290123	5.16	0.106173	3.672	0.315333	1.375
D3-147	50.1	15.2	0.303393	5.85	0.116766	4.387	0.342667	1.35
D3-148	43.1	12.9	0.299304	4.8	0.111369	4.117	0.322333	1.36842
D3-160	43.1	12.5	0.290023	4.56	0.1058	3.033	0.328333	1.36842
D3-164	40.6	12.2	0.300493	5.19	0.127833	4.225	0.370667	1.40541
D3-166	49.2	14.5	0.294715	4.94	0.100407	3.629	0.305	1.4
D3-167	47.5	14.3	0.301053	4.76	0.100211	3.734	0.299667	1.325
D3-177	43.5	14.2	0.326437	4.82	0.110805	3.396	0.315667	1.28205
D3-179	48.1	15	0.31185	4.43	0.0920998	2.626	0.266667	1.325
E1-7	48.2	13.5	0.280083	5.63	0.116805	4.966	0.348667	1.35
E1-18	47.8	13.7	0.286611	5.19	0.108577	3.83	0.322667	1.35
E1-21	42.2	11.8	0.279621	4.76	0.112796	4.548	0.354667	1.34211
E1-25	49.5	14.4	0.290909	5.09	0.102828	4.489	0.332667	1.375
E1-28	46.4	12.8	0.275862	4.56	0.0982759	2.238	0.309667	1.35897
E1-32	48.2	12.4	0.257261	5.3	0.109959	4.338	0.351333	1.41026
E1-34	52.8	13.3	0.251894	5.53	0.104735	2.826	0.315333	1.34146
E1-39	45.7	13.8	0.301969	5.05	0.110503	4.929	0.325	1.3
E1-41	41.5	12.2	0.293976	4.36	0.10506	3.703	0.314	1.25641
E1-52	44	12.7	0.288636	4.09	0.0929545	4.327	0.343333	1.35897
E1-69	54.8	14.6	0.266423	5.45	0.0994526	2.935	0.323667	1.33333
E1-80	48.6	13	0.26749	5.4	0.111111	3.447	0.343667	1.325
E1-86	52.9	13.8	0.26087	4.93	0.0931947	3.81	0.315667	1.57143
E1-91	44.3	13.2	0.297968	4.21	0.0950339	2.41	0.286333	1.42105
E1-95	43.6	12.9	0.295872	4.77	0.109404	2.688	0.329667	1.34211
E1-98	44.5	13.1	0.294382	5.2	0.116854	3.913	0.344333	1.42105
E1-102	46.8	12.6	0.269231	5.02	0.107265	3.456	0.319333	1.3
E1-105	46.6	13.4	0.287554	4.67	0.100215	3.587	0.289333	1.38462
E1-111	47.8	13.8	0.288703	5.45	0.114017	4.342	0.348	1.325
E1-112	39.2	11.9	0.303571	4.41	0.1125	3.69	0.313	1.44444
E1-124	42.1	12.8	0.304038	4.67	0.110926	2.955	0.314333	1.36842
E1-131	44.5	12	0.269663	4.87	0.109438	4.092	0.327333	1.35897
E1-133	45.5	13.2	0.29011	5.07	0.111429	3.606	0.333667	1.275
E1-135	51.1	14.1	0.27593	5.56	0.108806	4.44	0.345333	1.31707
E1-141	42.5	9.7	0.228235	5.28	0.124235	4.54	0.369333	1.41026
E1-150	41.5	11.8	0.284337	4.42	0.106506	3.716	0.304	1.40541
E1-158	52	15.4	0.296154	5.31	0.102115	2.399	0.324333	1.29268
E1-165	45.1	12.8	0.283814	5.21	0.115521	5.498	0.361333	1.33333
E1-169	52	13.3	0.255769	6.11	0.1175	5.419	0.371667	1.4
E1-171	57.3	14.6	0.254799	5.71	0.099651	2.383	0.320667	1.34884
E1-178	49.7	13.3	0.267606	5.24	0.105433	4.401	0.328	1.35
E2-36	45.2	11.9	0.263274	5.85	0.129425	3.704	0.372	1.30769
E2-41	44	12.8	0.290909	4.19	0.0952273	3.369	0.286	1.30769
E2-58	47.9	12.2	0.254697	5	0.104384	4.392	0.332667	1.325
E2-81	40	12.1	0.3025	4.37	0.10925	3.492	0.310667	1.26316
E2-87	45.1	11.6	0.257206	5.27	0.116851	5.08	0.349667	1.3
E2-91	43.9	12.9	0.29385	5.31	0.120957	3.058	0.341	1.3
E2-97	48.8	12.8	0.262295	4.8	0.0983607	3.009	0.299333	1.35
E2-99	50.8	12.2	0.240157	5.51	0.108465	3.448	0.326667	1.3
E2-113	53	12.9	0.243396	5.39	0.101698	2.812	0.318	1.36585
E2-115	52.2	13.6	0.260536	6.72	0.128736	5.218	0.423333	1.325
E2-139	44.5	11.9	0.267416	4.51	0.101348	2.977	0.305333	1.35897
E2-140	48	14	0.291667	4.54	0.0945833	1.772	0.281	1.41026
E2-151	53.7	14.2	0.264432	5.03	0.0936685	3.287	0.274667	1.425
E2-154	53.1	14	0.263653	5.8	0.109228	4.64	0.347333	1.2619
E2-157	43.8	12.7	0.289954	4.2	0.0958904	3.636	0.286333	1.375
E2-171	47.2	12.3	0.260593	5	0.105932	1.512	0.34	1.3
E2-172	48.6	12.7	0.261317	5.4	0.111111	5.375	0.337667	1.21951
E2-178	36.7	10.9	0.297003	3.19	0.086921	1.843	0.246	1.33333
E3-11	44.6	14.5	0.325112	4.26	0.0955157	3.636	0.299667	1.275
E3-13	40.2	11.2	0.278607	4.76	0.118408	4.802	0.420667	1.25
E3-17	48.7	13.3	0.273101	5.38	0.110472	4.38	0.350333	1.19048
E3-32	48.5	12	0.247423	5.24	0.108041	3.735	0.324333	1.41026
E3-35	47.3	12.9	0.272727	5.04	0.106554	3.849	0.327333	1.41026
E3-50	46.7	15	0.321199	5.26	0.112634	3.97	0.355667	1.38462
E3-60	44.6	11.8	0.264574	4.43	0.0993274	1.989	0.288667	1.44737
E3-75	47.6	13.7	0.287815	5.13	0.107773	4.316	0.333333	1.375
E3-83	47.4	12.5	0.263713	5.17	0.109072	4.848	0.338	1.34146
E3-87	44.5	13.7	0.307865	4.49	0.100899	3.362	0.291333	1.33333
E3-90	45.6	12.6	0.276316	4.05	0.0888158	2.943	0.254667	1.225
E3-98	41.9	12.6	0.300716	4.68	0.111695	4.143	0.327667	1.23077
E3-102	43.9	14.4	0.328018	4.3	0.0979499	3.475	0.281667	1.275
E3-106	47.9	13.2	0.275574	5.14	0.107307	4.962	0.332333	1.4
E3-115	50.7	14.7	0.289941	5.26	0.103748	3.117	0.314	1.31707
E3-122	46.1	12.8	0.277657	4.3	0.0932755	1.912	0.278667	1.3
F1-3	44.5	13.7	0.307865	4.87	0.109438	3.639	0.329667	1.35897
F1-18	43.3	14.4	0.332564	4.93	0.113857	4.151	0.345667	1.28205
F1-49	52.1	17.5	0.335893	5.11	0.0980806	3.431	0.305667	1.30952
F1-56	41.6	13.1	0.314904	4.44	0.106731	2.786	0.319	1.31579
F1-66	44.4	13	0.292793	4.68	0.105405	4.356	0.325333	1.44737
F1-67	49.7	14.4	0.289738	4.99	0.100402	4.134	0.328	1.29268
F1-82	39.4	12	0.304569	4.17	0.105838	3.741	0.314333	1.43243
F1-84	43	13.7	0.318605	4.48	0.104186	4.4	0.313333	1.39474
F1-86	42.9	13.9	0.324009	4	0.0932401	3.113	0.275667	1.36842
F1-96	43.3	12.1	0.279446	4.69	0.108314	4.534	0.325333	1.44737
F1-111	47.5	11.9	0.250526	5.18	0.109053	4.488	0.352333	1.26829
F1-119	42.5	12.4	0.291765	5.34	0.125647	5.247	0.383	1.36842
F1-147	50.9	14.9	0.292731	5.36	0.105305	4.423	0.346333	1.4
F1-158	50.4	15.1	0.299603	4.87	0.096627	3.746	0.311	1.31707
F1-163	42.8	12.7	0.296729	4.28	0.1	3.626	0.304667	1.25641
F1-164	45.8	11.1	0.242358	4.89	0.106769	3.672	0.329333	1.325
F1-171	49.1	11.9	0.242363	5.04	0.102648	3.596	0.328333	1.2439
F2-9	51	13	0.254902	4.92	0.0964706	2.541	0.296667	1.34146
F2-30	51.1	12.6	0.246575	5.45	0.106654	3.869	0.343333	1.4
F2-47	46.6	13.6	0.291845	5.35	0.114807	3.926	0.354	1.3
F2-56	49.8	13.5	0.271084	5.98	0.12008	4.891	0.389333	1.31707
F2-76	47.8	13.2	0.276151	5.41	0.11318	4.612	0.356667	1.30769
F2-90	46.7	14	0.299786	3.93	0.0841542	2.457	0.263	1.325
F2-101	42.9	14.3	0.333333	5.01	0.116783	4.367	0.335	1.25641
F2-106	42.9	14.1	0.328671	5.01	0.116783	4.975	0.340667	1.34211
F2-110	43.3	11.5	0.265589	3.96	0.091455	3.216	0.266	1.36842
F2-111	38.7	11.7	0.302326	5.15	0.133075	4.995	0.395667	1.26316
F2-123	48.7	14.9	0.305955	4.84	0.099384	3.617	0.304667	1.4359
F2-149	49.7	14.7	0.295775	4.84	0.0973843	2.356	0.304667	1.29268
F2-150	47.4	16	0.337553	4.41	0.093038	2.554	0.288667	1.4359
F2-153	51.3	14.3	0.278752	5.12	0.0998051	3.995	0.326667	1.31707
F2-167	46.6	13.4	0.287554	4.82	0.103433	4.404	0.325	1.26829
F2-168	48.5	14.2	0.292784	5.43	0.111959	3.853	0.342	1.35
F2-179	43.6	13.1	0.300459	4.45	0.102064	3.573	0.306333	1.33333
F3-3	40.8	10.9	0.267157	4.62	0.113235	3.258	0.310667	1.31579
F3-7	42.3	12.5	0.295508	4.2	0.0992908	3.166	0.279	1.36842
F3-13	44.2	13.2	0.298643	4.97	0.112443	3.271	0.316	1.30769
F3-15	46.9	14.5	0.309168	5.29	0.112793	4.943	0.338667	1.35
F3-17	48.6	13.3	0.273663	5.72	0.117695	4.911	0.357	1.325
F3-22	40.3	10.6	0.263027	4.43	0.109926	3.697	0.318667	1.21951
F3-38	39.2	10.9	0.278061	4.14	0.105612	3.187	0.289	1.37838
F3-41	44.6	11.1	0.248879	4.72	0.10583	3.291	0.324333	1.275
F3-47	41.5	12.3	0.296386	4.48	0.107952	3.648	0.316	1.31579
F3-67	45.7	12.6	0.275711	5.36	0.117287	4.807	0.344667	1.25
F3-84	41.2	10.6	0.257282	4.99	0.121117	4.193	0.322333	1.37838
F3-96	47.9	12.5	0.26096	5.63	0.117537	5.186	0.357667	1.3
F3-100	40.1	12.2	0.304239	4.41	0.109975	3.012	0.276333	1.25641
F3-111	43.6	13.6	0.311927	4.86	0.111468	3.825	0.323	1.30769
D1-5	46.1	13.4	0.290672	5.03	0.109111	4.067	0.326333	1.42105
D1-9	40.7	14	0.34398	4.37	0.107371	1.975	0.303333	1.40541
D1-16	45.1	12.7	0.281596	5.34	0.118404	1.953	0.336	1.42105
D1-43	48.3	13.8	0.285714	4.72	0.0977226	2.858	0.275333	1.41026
D1-51	44.9	12.6	0.280624	4.67	0.104009	3.084	0.304	1.33333
D1-68	47	15.9	0.338298	5.35	0.11383	3.611	0.343	1.275
D1-90	47	14.9	0.317021	4.99	0.10617	4.366	0.309667	1.38462
D1-116	40	14.5	0.3625	4.43	0.11075	2.603	0.305	1.35135
D1-126	43.3	14.5	0.334873	4.68	0.108083	2.631	0.305333	1.30769
D1-133	44.8	14.2	0.316964	5.17	0.115402	5.121	0.347333	1.30769
D1-137	50.4	14.3	0.28373	4.92	0.097619	3.573	0.283	1.36585
D1-147	41.2	13	0.315534	4.53	0.109951	3.247	0.309667	1.37838
D1-162	40.2	12.6	0.313433	4.47	0.111194	4.187	0.308667	1.37838
D2-4	43.6	11.6	0.266055	4.82	0.11055	3.192	0.314333	1.36842
D2-15	43.4	13.7	0.315668	3.82	0.0880184	2.448	0.254333	1.36842
D2-29	43.8	13.4	0.305936	4.12	0.0940639	3.012	0.279667	1.39474
D2-40	46.9	14.4	0.307036	4.67	0.0995736	2.112	0.308	1.47368
D2-50	46.3	13.2	0.285097	4.82	0.104104	3.583	0.293	1.35897
D2-59	44.1	13.1	0.297052	5.07	0.114966	3.84	0.321333	1.39474
D2-66	40.1	11.7	0.291771	4.3	0.107232	3.09	0.291	1.31579
D2-68	35.7	11.7	0.327731	4.24	0.118768	3.454	0.303667	1.4
D2-85	50.7	16.1	0.317554	5.16	0.101775	3.644	0.302	1.375
D2-86	41.5	12.4	0.298795	3.76	0.0906024	2.813	0.247333	1.39474
D2-89	45.2	12.4	0.274336	4.84	0.10708	2.635	0.278333	1.33333
D2-101	42.5	14.1	0.331765	4.57	0.107529	3.868	0.289333	1.34211
D2-106	47.5	15.7	0.330526	4.74	0.0997895	3.703	0.282	1.41026
D2-109	40.4	12.3	0.304455	4.14	0.102475	3.551	0.29	1.40541
D2-113	43.2	12.5	0.289352	3.84	0.0888889	2.702	0.257333	1.36842
D2-117	42.8	13.2	0.308411	4.7	0.109813	3.646	0.314333	1.48649
D2-120	48.1	14.9	0.309771	4.51	0.093763	3.348	0.255	1.375
D2-134	40.1	13.6	0.339152	4.9	0.122195	3.657	0.329	1.28947
D2-146	41.8	12.6	0.301435	4.32	0.103349	3.781	0.287333	1.28947
D2-151	41.6	12.9	0.310096	3.6	0.0865385	2.812	0.240333	1.31579
D2-174	45.4	14.6	0.321586	4.87	0.107269	3.708	0.309333	1.33333
D3-9	42.7	12.3	0.288056	4.41	0.103279	4.001	0.302	1.36842
D3-15	47.9	12.7	0.265136	4.19	0.0874739	2.551	0.251	1.35
D3-17	42.4	14.3	0.337264	4.17	0.0983491	3.428	0.288333	1.25641
D3-19	46.8	14.6	0.311966	5.71	0.122009	3.67	0.333667	1.34146
D3-20	44.3	14.1	0.318284	5.27	0.118962	5.445	0.351667	1.36842
D3-27	47.7	14.4	0.301887	5.1	0.106918	4.337	0.311667	1.325
D3-41	49.7	13.6	0.273642	5.22	0.10503	4.297	0.31	1.48718
D3-42	51.4	13.2	0.256809	4.99	0.0970817	3.468	0.279333	1.34146
D3-49	40.6	12.1	0.29803	4.55	0.112069	4.187	0.313333	1.40541
D3-58	50.2	14.9	0.296813	5.17	0.102988	2.742	0.302333	1.375
D3-64	38.9	11.6	0.298201	3.72	0.0956298	3.392	0.263667	1.35135
D3-66	50.1	16.2	0.323353	5.52	0.11018	4.525	0.338667	1.325
D3-71	44.1	12.8	0.290249	4.98	0.112925	4.302	0.355	1.31579
D3-77	45.8	14	0.305677	4.99	0.108952	3.294	0.319333	1.33333
D3-81	48.3	14.1	0.291925	5.19	0.107453	3.061	0.328667	1.3
D3-86	46.5	15.2	0.326882	5.17	0.111183	2.924	0.318	1.39474
D3-93	40.5	13	0.320988	4.43	0.109383	4.148	0.298667	1.37838
D3-108	52.3	14.4	0.275335	6	0.114723	4.717	0.37	1.34146
D3-113	49.4	15.7	0.317814	4.97	0.100607	3.398	0.300333	1.35
D3-130	41.7	13	0.311751	4.68	0.11223	3.656	0.317333	1.34211
D3-144	46.8	13.5	0.288462	5.06	0.10812	3.594	0.309667	1.35897
D3-148	42.3	13.6	0.321513	4.71	0.111348	4.118	0.318333	1.34211
D3-160	43.2	13.4	0.310185	4.65	0.107639	3.851	0.315333	1.30769
D3-164	42	12.3	0.292857	5.46	0.13	5.086	0.361667	1.34211
D3-166	50.5	14.9	0.29505	4.84	0.0958416	3.962	0.289333	1.34146
D3-167	48.7	14.5	0.297741	5.1	0.104723	3.454	0.312	1.29268
D3-177	44.2	15.3	0.346154	5.02	0.113575	4.252	0.321667	1.275
E1-21	42.8	12.7	0.296729	4.81	0.112383	4.613	0.329	1.28205
E1-25	39.4	11.7	0.296954	4.51	0.114467	1.886	0.308667	1.47222
E1-28	46.9	13	0.277186	5.02	0.107036	4.597	0.323	1.325
E1-32	47	12.5	0.265957	5.45	0.115957	3.895	0.349	1.38462
E1-41	42.2	12.7	0.300948	4.28	0.101422	2.785	0.296	1.28205
E1-52	48.1	13.6	0.282744	5.22	0.108524	3.768	0.314	1.35
E1-69	54.7	15.1	0.276051	5.56	0.101645	3.373	0.316667	1.35714
E1-80	49	13.3	0.271429	5.53	0.112857	4.58	0.335667	1.26829
E1-86	51	12.9	0.252941	5.46	0.107059	4.074	0.333333	1.31707
E1-90	44.5	12.2	0.274157	4.63	0.104045	3.418	0.287	1.42105
E1-95	42.6	12.9	0.302817	4.76	0.111737	3.537	0.308667	1.36842
E1-98	43.3	12.4	0.286374	5.17	0.1194	4.551	0.343	1.33333
E1-102	43.9	12.4	0.28246	4.94	0.112528	3.873	0.327	1.28205
E1-111	47.5	14.2	0.298947	5.46	0.114947	3.72	0.342333	1.3
E1-112	39.6	11.9	0.300505	4.53	0.114394	3.383	0.314	1.44444
E1-124	42.2	13.1	0.310427	4.74	0.112322	3.551	0.309	1.36842
E1-126	48.9	13.5	0.276074	5.52	0.112883	4.614	0.34	1.3
E1-135	50.5	13.9	0.275248	5.57	0.110297	4.034	0.331333	1.375
E1-141	41.7	10.6	0.254197	5.06	0.121343	4.06	0.352	1.31579
E1-150	43.9	12.1	0.275626	4.78	0.108884	4.2	0.307	1.39474
E1-165	46.1	12.8	0.277657	6.18	0.134056	3.989	0.372667	1.35897
E1-167	51	14.6	0.286275	4.84	0.094902	3.425	0.303667	1.35
E1-169	38	13.6	0.357895	5.34	0.140526	5.016	0.306	1.26829
E1-171	58.7	14.9	0.253833	5.87	0.1	2.974	0.312667	1.42857
E1-178	49.5	13.6	0.274747	5.21	0.105253	4.305	0.318667	1.29268
E2-2	48.4	15.7	0.32438	5.08	0.104959	4.064	0.328	1.29268
E2-36	42.4	10.6	0.25	4.77	0.1125	3.603	0.312667	1.34211
E2-41	44.2	13	0.294118	4.41	0.0997738	3.054	0.284333	1.25
E2-58	45.2	12.2	0.269912	5.06	0.111947	4.608	0.340667	1.33333
E2-69	47.9	13.8	0.2881	4.98	0.103967	4.398	0.312667	1.325
E2-91	46.8	12.3	0.262821	4.32	0.0923077	2.635	0.265667	1.35
E2-94	43.3	14.1	0.325635	4.16	0.0960739	3.207	0.281	1.33333
E2-97	47.7	12.6	0.264151	4.2	0.0880503	2.366	0.254333	1.35
E2-107	45.7	12.2	0.266958	4.27	0.0934354	3.074	0.270333	1.3
E2-113	49.9	12.6	0.252505	4.85	0.0971944	2.405	0.279667	1.31707
E2-115	54.9	14.2	0.258652	5.55	0.101093	3.699	0.313333	1.30952
E2-127	44.9	13.3	0.296214	4.35	0.096882	3.611	0.297667	1.30769
E2-154	44.7	12.6	0.281879	4.91	0.109843	4.139	0.317	1.25
E2-157	42.3	12.9	0.304965	4.17	0.0985816	2.933	0.272667	1.25641
E2-171	47.9	13.4	0.279749	4.89	0.102088	3.171	0.301667	1.3
E2-172	49.4	12.8	0.259109	5.14	0.104049	4.229	0.309	1.275
E3-11	44.9	14.7	0.327394	4.33	0.0964365	3.303	0.289333	1.30769
E3-13	43.5	12.6	0.289655	4.71	0.108276	4.407	0.311333	1.275
E3-17	47.8	12.9	0.269874	5.14	0.107531	3.911	0.333333	1.21951
E3-35	48.8	13	0.266393	5.45	0.11168	4.306	0.343333	1.375
E3-60	44	11.8	0.268182	4.75	0.107955	4.007	0.330333	1.28205
E3-83	45	12.2	0.271111	4.69	0.104222	3.477	0.311667	1.42105
E3-90	43.4	13.1	0.301843	4.77	0.109908	3.16	0.316	1.225
E3-102	43.3	14.5	0.334873	4.24	0.0979215	3.573	0.277667	1.25
E3-104	48.2	11.3	0.23444	5.26	0.109129	3.758	0.33	1.325
F1-3	45.2	13.6	0.300885	5.44	0.120354	3.781	0.347333	1.35
F1-18	43.6	14.5	0.332569	5.21	0.119495	4.594	0.342333	1.30769
F1-56	41.9	12.7	0.303103	4.98	0.118854	3.242	0.328	1.25641
F1-66	43.6	12.8	0.293578	4.67	0.10711	3.998	0.313	1.41026
F1-67	49.8	14.5	0.291165	4.88	0.097992	3.777	0.302	1.31707
F1-82	39	11.4	0.292308	4.1	0.105128	4.403	0.297333	1.47222
F1-86	44.4	14.9	0.335586	4.31	0.0970721	3.477	0.270333	1.39474
F1-96	43.4	12.2	0.281106	4.55	0.104839	4.319	0.312667	1.42105
F1-111	48.8	12.2	0.25	5.32	0.109016	4.534	0.332667	1.2439
F1-119	41.2	12.2	0.296117	5.17	0.125485	4.595	0.356	1.40541
F1-141	43.5	13.7	0.314943	5.32	0.122299	4.85	0.353	1.36842
F1-147	51.2	15.1	0.294922	5.38	0.105078	4.298	0.335	1.375
F1-155	46.4	14.8	0.318966	4.51	0.0971983	3.772	0.301667	1.3
F1-158	51	15.4	0.301961	5.58	0.109412	3.762	0.341667	1.375
F1-164	46.1	11.5	0.249458	4.75	0.103037	3.371	0.305667	1.35897
F1-171	48.1	11.3	0.234927	4.82	0.100208	3.512	0.291333	1.26829
F2-8	44.6	13.1	0.293722	3.34	0.0748879	2.28	0.253	1.325
F2-9	44.5	12.5	0.280899	4.5	0.101124	3.344	0.292333	1.33333
F2-30	49.3	13.2	0.267748	5.29	0.107302	3.852	0.325	1.375
F2-43	47.2	13.4	0.283898	4.05	0.0858051	3.001	0.241333	1.325
F2-47	47.6	13.3	0.279412	4.53	0.0951681	3.751	0.285667	1.3
F2-53	54.8	15.2	0.277372	5.03	0.0917883	3.242	0.291	1.39024
F2-76	46.3	13.1	0.282937	5.39	0.116415	1.667	0.297	1.44737
F2-101	42.5	14.3	0.336471	5.06	0.119059	3.898	0.314	1.34211
F2-106	45.4	15.1	0.332599	5.39	0.118722	4.156	0.323333	1.33333
F2-110	44	11.9	0.270455	4.15	0.0943182	3.324	0.257667	1.21951
F2-111	43.9	12.9	0.29385	4.9	0.111617	4.733	0.322333	1.33333
F2-149	49.3	14.7	0.298174	5.18	0.105071	3.577	0.313	1.26829
F2-150	47	15.9	0.338298	4.4	0.093617	2.344	0.278667	1.38462
F2-153	50	14.2	0.284	5.53	0.1106	3.974	0.346333	1.29268
F2-167	46.1	13.3	0.288503	4.64	0.100651	3.857	0.312667	1.33333
F2-168	47.6	14.4	0.302521	4.65	0.0976891	3.229	0.289333	1.35
F2-173	49	13.4	0.273469	4.35	0.0887755	2.684	0.277	1.29268
F3-3	41	11.3	0.27561	4.63	0.112927	3.141	0.314333	1.28205
F3-7	41.9	12.4	0.295943	4.29	0.102387	2.821	0.278	1.36842
F3-13	48.8	14.1	0.288934	5.31	0.108811	3.583	0.300667	1.325
F3-15	46.4	14.4	0.310345	5.12	0.110345	3.906	0.319667	1.38462
F3-17	46.7	13.3	0.284797	5.26	0.112634	4.03	0.320333	1.38462
F3-22	40.5	12.1	0.298765	4.24	0.104691	2.3	0.289	1.34211
F3-26	43.5	13.4	0.308046	4.78	0.109885	3.486	0.291333	1.48649
F3-45	47.5	13.4	0.282105	5.3	0.111579	5.421	0.340667	1.35897
F3-47	41.3	12.4	0.300242	4.48	0.108475	3.251	0.308667	1.34211
F3-67	42.2	13.1	0.310427	5.02	0.118957	4.71	0.333	1.31579
F3-110	43.9	11.9	0.271071	5.22	0.118907	3.589	0.320333	1.33333
F3-111	45.1	14	0.310421	5.07	0.112417	3.512	0.319	1.42105
F3-136	55.2	16.2	0.293478	5.78	0.10471	3.704	0.325333	1.30952

## Sheet: 43 week phenotype
id	a1	a2	a3	a4	a5	a6	a7	a8		a1	EW
F1-30	47.6	12.62	0.265126	4.96	0.104202	3.899	305.667	1.375		a2	YW
E2-9	48.6	12.62	0.259671	4.15	0.0853909	2.2	259.333	1.3		a3	PY
D1-137	50.3	14.68	0.291849	4.99	0.0992048	3.089	296.667	1.4		a4	ESW
E2-91	55.1	14.31	0.25971	5.01	0.0909256	1.76	276	1.35714		a5	PSW
D1-158	56.5	15.45	0.273451	5.64	0.099823	1.221	317.333	1.525		a6	ESS
E3-131	54.8	14.71	0.268431	5.69	0.103832	4.074	299	1.32558		a7	EST
D1-141	53	14.02	0.264528	5.8	0.109434	4.019	313.667	1.4		a8	ESI
D2-105	49.2	13.91	0.282724	5.37	0.109146	4.734	332	1.4
F3-41	48.5	12.51	0.257938	4.35	0.0896907	3.048	286	1.3
E1-55	57.6	15.11	0.262326	5.28	0.0916667	3.196	282	1.38095
E1-81	45.3	11.84	0.261369	5.7	0.125828	4.125	322.333	1.325
F1-111	54.8	14.81	0.270255	5.45	0.0994526	4.617	319	1.25581
E3-12	51.4	13.62	0.264981	5.44	0.105837	4.255	322	1.375
D3-42	54.5	14.87	0.272844	4.9	0.0899083	2.869	257.333	1.30952
F3-1	50.5	13.62	0.269703	4.85	0.0960396	3.669	287.333	1.34146
E3-50	51.4	13.86	0.26965	4.72	0.0918288	2.674	278	1.30952
F2-123	48.9	13.5	0.276074	4.17	0.0852761	3.123	253.333	1.46154
F2-30	50.4	14.85	0.294643	4.63	0.0918651	2.717	270	1.425
F2-4	52.2	13.71	0.262644	4.53	0.0867816	2.977	247.333	1.36585
F3-17	49.8	14.2	0.285141	4.5	0.0903614	2.67	289.667	1.375
E1-164	51.4	14.47	0.281518	5.07	0.0986381	3.164	303	1.375
E1-126	44.4	11.99	0.270045	4.74	0.106757	4.321	306	1.275
E3-60	47.4	12.16	0.25654	4.93	0.104008	3.398	314.667	1.275
D2-67	41.1	11.54	0.280779	3.86	0.0939173	2.798	265.333	1.38462
F2-2	51	14.29	0.280196	4.2	0.0823529	2.177	283	1.45
D3-111	58	16.07	0.277069	5.9	0.101724	3.079	279.667	1.32558
E3-32	51.45	14.735	0.28662	4.955	0.0963071	3.666	299	1.35823
E3-90	43.9	12.81	0.2918	4.62	0.105239	3.653	295.333	1.25
F2-77	49.7	13.79	0.277465	4.57	0.0919517	2.278	264	1.34146
D3-15	48.8	14.36	0.294262	5.25	0.107582	1.832	240	1.425
E2-168	47.7	13.76	0.28847	4.23	0.0886792	1.563	262.333	1.35
D2-27	43.8	12.49	0.28516	4.43	0.101142	3.823	305	1.30769
F3-38	44.9	12.87	0.286637	5.13	0.114254	3.517	309	1.33333
F1-73	49.2	14.04	0.285366	5.25	0.106707	4.032	320.333	1.375
D3-141	57.2	17.33	0.302972	5.5	0.0961538	2.574	276.333	1.37209
E3-46	53.65	15.86	0.296313	4.745	0.0884436	2.558	270	1.27868
D3-19	52.25	15.56	0.297732	4.785	0.0915789	2.1375	256.833	1.34573
F2-62	49.6	14.37	0.289718	3.26	0.0657258	1.047	178.667	1.39024
F1-147	54	16.1	0.298148	5.21	0.0964815	1.594	320.667	1.41463
F1-64	47.6	14.24	0.29916	4.48	0.0941176	3.163	267	1.375
E2-87	46.4	13.73	0.295905	4.75	0.102371	4.129	301	1.325
D3-144	53.5	14.78	0.276262	5.49	0.102617	3.438	313.333	1.4359
F3-22	48.2	13.68	0.283817	4.35	0.090249	2.924	268	1.375
F2-60	53.1	15.72	0.296045	4.3	0.0809793	1.512	240	1.525
E2-107	50.7	14.72	0.290335	4.33	0.0854043	2.932	257	1.31707
D3-161	46.1	13.55	0.293926	5.31	0.115184	3.961	317	1.41026
F2-180	50.3	14.34	0.285089	5.19	0.103181	3.736	332	1.4
E2-8	49.7	14.83	0.29839	3.97	0.0798793	2.529	253	1.16279
D1-41	51.6	14.73	0.285465	5.23	0.101357	5.05	307.333	1.3
D2-127	51.1	14.1	0.27593	6.15	0.120352	4.514	360.667	1.34146
D1-5	47.1	14.29	0.303397	5.19	0.110191	4.327	367.333	1.41026
E1-28	52.6	15.33	0.291445	5.1	0.0969582	3.482	294	1.425
D2-53	51.5	15.14	0.293981	5.5	0.106796	3.002	302.667	1.425
D2-139	56.9	16.77	0.294728	4.6	0.0808436	1.996	264.667	1.35714
F1-161	43.9	12.89	0.293622	3.86	0.0879271	2.814	233.333	1.25
F1-157	55.7	16.3	0.292639	5.27	0.094614	4.865	309	1.41463
D1-84	55.1	14.35	0.260436	6.12	0.111071	3.771	299.333	1.39024
E1-1	55.9	15.65	0.279964	5.82	0.104114	4.364	329	1.36585
E3-35	58	17.03	0.293621	5.23	0.0901724	2.92	274.333	1.35714
F3-104	52.5	15.58	0.296762	5.74	0.109333	3.355	315.667	1.31707
D3-38	50.5	15.28	0.302574	6.38	0.126337	3.443	342	1.325
D2-169	43.3	12.66	0.292379	4.31	0.0995381	2.172	281.667	1.38462
F1-21	44.1	13.16	0.298413	4.51	0.102268	3.663	282	1.325
F1-76	50.3	15.5	0.308151	5.35	0.106362	4.174	280.333	1.29268
E2-139	46.3	13.79	0.29784	4.13	0.0892009	2.399	244	1.325
E1-18	50	15.16	0.3032	5.03	0.1006	3.4	302.667	1.375
D1-52	47.9	14.56	0.303967	5.62	0.117328	2.86	355.333	1.29268
F3-70	49.7	14.68	0.295372	4.47	0.0899396	2.501	281.333	1.26829
E3-178	45.7	13.66	0.298906	4.43	0.0969365	1.938	282	1.35897
E2-48	46	14.85	0.322826	4.09	0.088913	1.538	226.333	1.57895
E3-106	55	16.41	0.298364	4.89	0.0889091	3.593	290.333	1.39024
D1-16	47.6	14.33	0.30105	5.21	0.109454	3.946	319	1.4359
F3-16	46.1	13.4	0.290672	4.59	0.0995662	3.437	295.333	1.38462
E2-131	48.8	13.77	0.282172	4.33	0.0887295	3.324	271.667	1.33333
F2-8	48.4	14.16	0.292562	3.96	0.0818182	3.028	256	1.325
E3-54	51.5	15.51	0.301165	5.36	0.104078	4.504	314.667	1.4
F2-9	49.6	14.97	0.301815	4.23	0.0852823	3.599	257.667	1.29268
F1-96	46.6	13.98	0.3	5	0.107296	3.988	329.333	1.4359
D1-25	44.7	13.57	0.303579	5.26	0.117673	3.594	341	1.04082
E3-110	54.6	16.64	0.304762	5.48	0.100366	1.909	315.667	1.425
E3-31	42.8	14.21	0.332009	4.84	0.113084	3.471	343.333	1.39474
F3-45	51	15	0.294118	4.94	0.0968627	3.662	291.333	1.34146
F2-111	44.8	13.66	0.304911	4.75	0.106027	4.508	318.333	1.33333
D3-110	49	14.51	0.296122	4.09	0.0834694	3.112	267.333	1.275
F1-12	46.8	14.27	0.304915	4.5	0.0961538	1.625	286.333	1.38462
D3-21	50.2	15.05	0.299801	4.82	0.0960159	3.233	280	1.39024
F1-178	45.6	13.25	0.29057	4.2	0.0921053	2.352	271.667	1.44737
D1-54	53.6	16.4	0.30597	5.58	0.104104	3.89	315	1.45
F3-108	53.9	16.34	0.303154	5.14	0.0953618	3.573	294	1.33333
F1-66	46.6	14.17	0.304077	4.88	0.104721	2.704	315.333	1.4
F1-43	47.7	14.05	0.294549	5.37	0.112579	2.813	323.333	1.35897
F2-168	59.6	18.01	0.302181	5.69	0.0954698	2.65	293.333	1.45238
F1-63	45.5	13.85	0.304396	4.87	0.107033	3.463	298.667	1.275
D1-131	44.7	13.65	0.305369	4.05	0.090604	3.591	279.333	1.35897
E1-109	47.8	14.65	0.306485	5.06	0.105858	3.635	310	1.46154
D2-46	46.4	14.12	0.30431	3.97	0.0855603	1.053	244.667	1.375
E3-62	51.7	15.65	0.302708	5.39	0.104255	4.983	324	1.34146
F2-153	55.1	16.92	0.307078	5.74	0.104174	3.557	327.667	1.33333
F3-84	47.2	14.02	0.297034	4.7	0.0995763	4.09	286	1.41026
F2-61	53.7	15.73	0.292924	4.36	0.0811918	2.442	277.667	1.4359
D2-113	43.5	13.56	0.311724	3.6	0.0827586	1.461	233.667	1.44737
E2-115	56.9	17.52	0.307909	4.92	0.0864675	3.535	281.667	1.27907
F1-135	38.9	11.85	0.304627	4.09	0.105141	3.04	310.333	1.35135
D3-66	47.3	14.6	0.308668	5.08	0.1074	4.083	309.667	1.275
D2-74	43.1	13.36	0.309977	4.61	0.106961	3.794	293.333	1.44737
D3-49	47.1	14.39	0.30552	5.15	0.109342	3.676	307	1.15385
D2-50	49.7	14.61	0.293964	5.51	0.110865	3.466	328.333	1.34146
E3-30	39.6	12.64	0.319192	4.37	0.110354	3.945	320.333	1.44444
D3-25	53.3	16.24	0.30469	5.28	0.0990619	1.324	262.667	1.36585
D2-54	45	13.8	0.306667	4.47	0.0993333	3.444	281.333	1.35897
E3-8	54.3	16.34	0.300921	5.97	0.109945	4.055	348.333	1.27273
F2-179	46.2	14.83	0.320996	3.84	0.0831169	2.819	234.667	1.325
D3-167	51.5	15.9	0.308738	5.29	0.102718	3.203	316.333	1.30952
D1-138	50.6	15.65	0.309289	5.01	0.0990119	3.248	278.333	1.4
D2-92	54	16.66	0.308519	4.85	0.0898148	3.234	282	1.39024
D2-131	53	16.55	0.312264	5.48	0.103396	3.484	312.667	1.36585
F3-13	49	14.6	0.297959	4.42	0.0902041	2.806	267.333	1.35
F3-136	51.4	15.96	0.310506	5.77	0.112257	3.961	357	1.29268
D2-109	42.9	12.99	0.302797	4.41	0.102797	3.535	307.667	1.375
F1-83	48.8	15.25	0.3125	4.74	0.0971311	3.271	303.667	1.4
F1-158	53.3	16.59	0.311257	5.51	0.103377	3.996	320	1.36585
D2-35	50.7	15.63	0.308284	4.73	0.0932939	3.313	278.667	1.375
F2-149	50.2	16.1	0.320717	4.52	0.0900398	2.646	266	1.325
D2-103	52.4	16.67	0.31813	5.56	0.106107	3.972	336.333	1.34146
F2-169	50.3	15.68	0.31173	4.69	0.0932406	3.191	295	1.325
E2-80	49.1	15.43	0.314257	4.23	0.0861507	2.486	253	1.375
D2-4	46.7	14.4	0.308351	4.33	0.0927195	2.666	273	1.325
D2-107	52.8	16.15	0.305871	5.51	0.104356	3.587	296.667	1.4
D1-152	49	15.55	0.317347	4.75	0.0969388	2.233	271.333	1.4
D2-163	47.5	15.25	0.321053	4.09	0.0861053	2.098	244.667	1.35
D1-35	46.8	14.66	0.313248	4.51	0.0963675	2.825	286.667	1.325
F2-78	52.1	16.14	0.309789	5.35	0.102687	4.11	324.333	1.2619
D3-160	47.1	14.8	0.314225	5.2	0.110403	3.324	314.333	1.325
D1-110	49.3	15.68	0.318053	4.84	0.0981744	3.474	289	1.375
D3-64	41	12.66	0.30878	4.14	0.100976	3.298	257	1.31579
F1-119	45.8	14.4	0.31441	5.1	0.111354	4.502	317.333	1.33333
F2-128	52.1	16.7	0.320537	4.29	0.0823417	2.177	224.667	1.34146
D3-113	56.1	17.68	0.315152	5.05	0.0900178	2.992	264.333	1.30233
F2-110	50.5	15.95	0.315842	4.2	0.0831683	3.344	258	1.34146
F2-65	49.3	15.88	0.32211	4.03	0.0817444	2.931	250	1.29268
D1-91	43	13.52	0.314419	4.81	0.11186	4.014	273	1.38462
E2-173	45	14.42	0.320444	4.53	0.100667	2.728	281	1.275
D3-9	45.6	14.08	0.308772	4.63	0.101535	3.971	309.333	1.325
F3-71	54.6	17.02	0.311722	5.01	0.0917582	3.658	292.667	1.33333
D3-158	47.1	14.96	0.317622	4.68	0.0993631	3.853	281.667	1.35
E1-37	46.7	14.87	0.318415	4.39	0.0940043	3.712	293.667	1.3
F2-76	52.6	17.17	0.326426	5.25	0.0998099	3.927	322	1.475
F2-1	48.3	16	0.331263	4.44	0.0919255	3.163	286.667	1.325
D1-37	64.9	20.62	0.31772	6.95	0.107088	4.309	338.333	1.4186
D2-167	52.2	16.54	0.316858	5.32	0.101916	3.919	288.667	1.4
F1-74	41.6	13.17	0.316587	4.18	0.100481	3.669	282.667	1.45946
F2-101	41.2	13.11	0.318204	4.53	0.109951	3.561	308.667	1.34211
E3-85	46.3	14.77	0.319006	4.79	0.103456	3.636	305	1.41026
D3-166	53.8	17.1	0.317844	5.08	0.0944238	3.83	303.667	1.30952
E2-94	43.3	13.95	0.322171	4.24	0.0979215	3.606	292.333	1.28205
E3-36	51.6	15.85	0.307171	5.67	0.109884	4.339	396.333	1.4
D3-59	50.8	16.06	0.316142	5.63	0.110827	3.79	339.667	1.2619
F2-52	51.9	16.6	0.319846	4.22	0.0813102	2.872	270.333	1.34146
E3-86	43.7	13.98	0.319908	3.97	0.0908467	3.095	256.333	1.39474
E1-8	49.5	15.85	0.320202	4.99	0.100808	3.3	295.667	1.4
F2-64	48.4	15.43	0.318802	4.91	0.101446	3.523	292.333	1.325
E3-13	45.8	14.6	0.318777	4.58	0.1	2.849	283.333	1.33333
D2-116	49.2	15.78	0.320732	3.58	0.0727642	2.303	223.667	1.375
D2-26	43.9	14.5	0.330296	3.76	0.0856492	2.595	252.667	1.35897
D2-73	46.3	14.68	0.317063	4.14	0.0894168	2.314	257.333	1.425
D3-147	51.8	16.63	0.321042	5.87	0.11332	3.84	294	1.33333
D1-146	46.6	14.68	0.315021	4.75	0.101931	3.72	298.667	1.5
D2-160	44.2	13.99	0.316516	4.56	0.103167	2.704	316.667	1.33333
E2-76	53.9	16.91	0.313729	5.11	0.0948052	2.791	286	1.39024
D3-171	49.6	16	0.322581	5	0.100806	3.465	303.333	1.425
F3-100	48.6	15.8	0.325103	5.14	0.105761	4	318.333	1.35
D3-148	44.8	14.36	0.320536	4.77	0.106473	2.958	299.333	1.33333
F1-165	44.9	14.5	0.32294	4.18	0.0930958	2.666	274.333	1.38462
E1-167	50.5	16.32	0.323168	4.37	0.0865347	2.752	265.333	1.34146
E1-124	42.3	13.94	0.329551	4.2	0.0992908	2.229	279	1.30769
D1-64	43.5	13.96	0.32092	4.66	0.107126	3.05	313.667	1.33333
D1-119	47.3	15.35	0.324524	4.27	0.0902748	3.158	255	1.41026
D1-172	45.6	15.28	0.335088	5.17	0.113377	3.545	298.667	1.44737
D3-180	52.8	17.17	0.325189	4.67	0.088447	1.064	259.333	1.36585
F1-82	41.1	13.11	0.318978	4.08	0.0992701	3.16	273.333	1.43243
E2-41	49.8	16.37	0.328715	4.23	0.0849398	2.618	238.333	1.2381
E1-151	52.6	16.65	0.31654	5.03	0.0956274	2.571	293.667	1.39024
F2-35	42.2	13.76	0.326066	3.6	0.0853081	1.347	250.667	1.42105
E1-41	42.4	13.92	0.328302	4.49	0.105896	3.662	330	1.34211
D2-19	47.3	15.33	0.324101	4.89	0.103383	3.233	293	1.46154
D1-73	48.2	16.16	0.33527	5.04	0.104564	2.438	298.667	1.375
D1-128	51.9	17.12	0.329865	4.6	0.088632	3.574	262.667	1.4359
D1-95	52.7	17.4	0.330171	6.73	0.127704	2.145	267	1.41463
D1-2	51.1	16.86	0.329941	5.17	0.101174	2.966	293.333	1.4
F3-15	48	15.74	0.327917	4.41	0.091875	2.902	277.333	1.325
D1-90	51	16.76	0.328627	5.56	0.10902	3.248	282.667	1.34146
F3-67	45.7	14.95	0.327133	4.24	0.092779	3.552	285	1.275
F2-34	58.9	19.27	0.327165	6.08	0.103226	4.431	346.333	1.30952
E2-146	49.2	16.61	0.337602	3.77	0.076626	2.228	226.667	1.34146
E2-135	48.8	16.19	0.331762	4.49	0.0920082	2.845	272.667	1.35
F1-5	41.3	13.71	0.331961	3.86	0.0934625	0.958	228	1.43243
E2-138	45.9	14.78	0.322004	4.41	0.0960784	3.816	274.333	1.38462
F2-100	44.2	14.68	0.332127	5.57	0.126018	3.103	369	1.39474
E3-130	45.9	15.22	0.33159	4.66	0.101525	2.326	278.333	1.47368
D3-20	46.5	15.13	0.325376	4.74	0.101935	3.479	290.667	1.41026
D1-153	54	18.01	0.333519	5.93	0.109815	3.763	313	1.45
E1-150	40.5	14.27	0.352346	4.96	0.122469	2.936	331	1.52778
D2-66	43.1	14.4	0.334107	3.95	0.0916473	2.283	243.333	1.325
D2-59	43.9	14.5	0.330296	4.57	0.1041	3.875	291.333	1.44737
D3-5	52	17.36	0.333846	6.94	0.133462	2.2	326	1.39024
F2-160	59.5	19.74	0.331765	5.78	0.0971429	3.379	304.667	1.32558
F1-3	48.9	16.4	0.335378	4.22	0.0862986	2.164	243.667	1.30952
F3-103	45.5	15.02	0.33011	4.5	0.0989011	3.405	287.333	1.3
D2-108	50.3	16.68	0.33161	4.83	0.0960239	2.497	289	1.375
D2-68	46.6	15.28	0.327897	4.46	0.0957082	2.289	274.333	1.41026
D1-126	45.3	15.21	0.335762	4.66	0.10287	3.694	293.667	1.35897
E2-136	44.8	15.38	0.343304	3.32	0.0741071	1.492	205.333	1.35897
F2-41	50.5	16.87	0.334059	4.7	0.0930693	2.555	283.667	1.34146
D3-157	48.4	16.62	0.343388	4.77	0.0985537	3.46	266	1.31707
E3-102	46.4	14.43	0.310991	4.89	0.105388	3.438	309.667	1.21951
D3-31	55.5	18.31	0.32991	5.15	0.0927928	3.761	315	1.46341
E3-87	47.5	15.92	0.335158	5.01	0.105474	3.88	307.333	1.2619
E1-161	39.1	13.66	0.349361	4.07	0.104092	1.658	294.333	1.25641
D2-155	40.7	13.79	0.338821	3.85	0.0945946	1.782	226	1.5
D3-36	43.7	14.91	0.34119	5.31	0.12151	4.636	340.333	1.30769
D1-162	44.75	15.23	0.340337	4.735	0.10581	3.211	300.167	1.38013
D2-101	41.1	14.25	0.346715	3.04	0.0739659	1.447	198.667	1.39474
D2-134	40.7	13.88	0.341032	4.47	0.109828	3.45	312.667	1.31579
D2-135	43.9	15.56	0.354442	5.04	0.114806	4.143	351.667	1.35897
D2-117	44.4	15.6	0.351351	4.65	0.10473	3.648	319	1.44737
E1-91	49.1	16.93	0.344807	4.88	0.099389	3.698	275.333	1.4
F2-81	41.9	14.46	0.345107	3.39	0.0809069	2.926	232.667	1.28205
F2-87	40.2	13.87	0.345025	3.13	0.0778607	2.151	207.667	1.28947
D2-166	49.2	16.48	0.334959	4.6	0.0934959	3.518	275.667	1.26829
E1-111	46.4	16.38	0.353017	5.59	0.120474	3.269	360.667	1.275
D1-9	44.5	15.79	0.354831	4.19	0.0941573	3.345	283.333	1.33333
D3-86	49.3	17.16	0.348073	5.35	0.108519	2.688	305.667	1.375
F2-106	45.3	15.54	0.343046	4.74	0.104636	3.625	310.333	1.275
F1-36	46.6	16.68	0.35794	4.99	0.107082	3.642	281	1.36585
E2-101	50	17.92	0.3584	4.17	0.0834	2.87	243.333	1.31707
D2-151	47	16.73	0.355957	3.5	0.0744681	1.331	170.667	1.325
F1-86	48.2	17.29	0.358714	3.91	0.0811203	1.809	224.333	1.375
D2-106	53.3	19.09	0.358161	4.31	0.080863	2.655	237	1.425
E3-104	44.6	10.1	0.226457	4.47	0.100224	2.581	284.667	1.275
F1-30	43.4	10.09	0.232488	4.72	0.108756	3.383	310	1.42105
E3-41	53.6	13.66	0.254851	6.42	0.119776	5.269	356	1.34146
E2-9	50.5	12.6	0.249505	4.38	0.0867327	2.771	257.333	1.34146
F1-171	51.4	14.1	0.274319	5.06	0.0984436	3.502	315.333	1.2619
E2-95	53.9	14.15	0.262523	4.81	0.0892393	2.946	287.667	1.22222
D1-158	56	15.62	0.278929	6.29	0.112321	3.605	312	1.525
F3-27	54.9	14.54	0.264845	5.92	0.107832	4.487	345.333	1.39024
E3-131	50.9	15.08	0.296267	5.53	0.108644	4.024	325.333	1.31707
D1-141	54.1	14.73	0.272274	5.37	0.0992606	3.322	276.667	1.35714
D2-105	50.6	12.91	0.255138	6	0.118577	4.123	337.667	1.425
F3-41	47.2	12.81	0.271398	4.43	0.0938559	3.215	282	1.35
E1-81	49.4	13.16	0.266397	4.75	0.0961538	3.35	283.333	1.29268
E3-12	50.8	13.83	0.272244	5.35	0.105315	4.045	329.333	1.31707
D3-42	53.4	14.3	0.26779	4.78	0.0895131	3.038	249.667	1.30952
F3-1	48.8	13.35	0.273566	5.17	0.105943	3.596	304	1.325
F3-140	47.6	12.95	0.272059	5.4	0.113445	3.333	306.333	1.325
E3-50	47.2	13.21	0.279873	4.59	0.0972458	3.024	322.333	1.3
F2-123	52.9	14.49	0.273913	4.9	0.0926276	3.242	277.333	1.41463
F2-47	56.8	15.65	0.275528	5.38	0.0947183	3.046	284.667	1.33333
E1-62	53.6	15.28	0.285075	6.06	0.11306	4.723	346	1.41463
E2-127	49.9	14.7	0.294589	4.58	0.0917836	3.198	268	1.30952
F2-30	54.6	14.38	0.26337	5.99	0.109707	2.675	348.333	1.36585
E2-172	51.4	14.35	0.279183	4.53	0.0881323	2.5	260	1.34146
F2-4	47.6	13.77	0.289286	3.86	0.0810924	2.858	259.667	1.35
F3-17	48.8	13.46	0.27582	4.29	0.0879098	3.415	258.667	1.35
D2-95	48.8	13.69	0.280533	5.01	0.102664	3.022	278.333	1.375
E1-164	52	14.6	0.280769	5.39	0.103654	3.363	328.667	1.36585
D1-133	48.8	16.44	0.336885	4.98	0.102049	4.23	319.667	1.35
E1-126	44	12.72	0.289091	4.6	0.104545	2.907	319.667	1.375
E3-60	47.3	14.11	0.298309	5.04	0.106554	3.803	320.667	1.3
D3-87	53.9	15.22	0.282375	5.65	0.104824	3.023	323	1.39024
D3-111	56.7	16.4	0.289242	5.5	0.0970018	3.154	293	1.35714
F3-96	50.3	14.62	0.290656	5.43	0.107952	4.296	326	1.375
E3-32	53	14.84	0.28	5.06	0.0954717	3.441	290.667	1.36585
F2-116	46.9	13.04	0.278038	4.82	0.102772	3.908	304.667	1.4359
F2-173	49.2	14.03	0.285163	4.97	0.101016	2.107	267.667	1.26829
E3-101	47	13.82	0.294043	5.19	0.110426	4.348	322.667	1.3
F2-77	45.5	13.37	0.293846	4.55	0.1	3.558	292.667	1.33333
D2-22	49.3	14.07	0.285396	4.98	0.101014	2.398	286	1.375
D3-15	46.7	13.57	0.290578	4.73	0.101285	1.532	257	1.35
E3-132	48.3	14.11	0.292133	5.53	0.114493	4.224	354.667	1.21951
F3-34	52.7	15.07	0.285958	5.23	0.099241	3.352	307.667	1.36585
E2-168	44.9	12.72	0.283296	4.34	0.0966592	2.781	284	1.325
D2-27	43.9	12.46	0.283827	5	0.113895	3.647	329.667	1.30769
D3-140	45.3	13.23	0.292053	4.98	0.109934	4.031	312.667	1.47368
D1-139	49.6	14.5	0.292339	5.15	0.103831	4.748	307.667	1.30952
D2-43	47.4	13.62	0.287342	4.68	0.0987342	2.183	278.667	1.29268
E3-122	50	14.37	0.2874	5.19	0.1038	4.021	304	1.4
F1-152	49.3	14.18	0.287627	5.07	0.10284	3.683	310.333	1.375
E2-99	51.6	14.87	0.288178	4.73	0.0916667	2.11	260	1.34146
E1-180	50	14.8	0.296	4.11	0.0822	2.216	238	1.29268
F3-58	44	12.71	0.288864	4.16	0.0945455	2.362	275	1.42105
E3-46	51.85	14.635	0.282675	4.865	0.0938284	2.8065	285.167	1.3011
D3-19	53.6	15.06	0.28097	5.27	0.0983209	2.447	300.333	1.34146
D3-4	45.8	12.76	0.278603	3.76	0.0820961	1.932	221	1.41026
F1-147	52.1	15.18	0.291363	5.33	0.102303	4.164	332.333	1.425
F1-64	46.3	13.05	0.281857	4.71	0.101728	2.696	294.667	1.325
E2-87	47.6	13.98	0.293697	5.13	0.107773	4.108	321	1.325
E3-43	51.4	15.14	0.294553	5.47	0.10642	3.908	293.667	1.4
D3-144	50.4	15.34	0.304365	5.34	0.105952	3.531	307	1.425
D2-72	51.3	15.06	0.293567	4.93	0.0961014	3.394	273	1.34146
F3-22	46.7	13.98	0.299358	4.39	0.0940043	3.328	269.667	1.41026
F2-60	56.4	16.21	0.287411	4.91	0.0870567	2.26	237.667	1.5
D3-89	46.3	13.64	0.2946	4.79	0.103456	1.65	293	1.3
D3-108	56.3	16.5	0.293073	5.16	0.0916519	3.177	268	1.45238
E2-107	48.1	14.39	0.299168	3.71	0.077131	2.443	222	1.29268
D3-161	46.4	13.66	0.294397	4.75	0.102371	3.383	299.333	1.41026
F2-180	47.4	14.29	0.301477	4.99	0.105274	3.88	324	1.35
E3-82	51.8	15.18	0.29305	4.93	0.0951737	2.763	276	1.4
E2-8	51.4	14.81	0.288132	4.23	0.0822957	3.192	239.667	1.2381
D1-41	48.7	14.69	0.301643	5.5	0.112936	4.43	312	1.325
D2-127	42.7	13.44	0.314754	5.08	0.11897	3.955	340	1.34211
D1-5	49.5	14.08	0.284444	5.41	0.109293	4.725	311.333	1.46154
D1-145	49.7	14.75	0.296781	4.96	0.0997988	3.729	289.333	1.4
E3-28	47.2	13.95	0.295551	4.95	0.104873	2.606	308.667	1.325
F1-161	46.8	13.85	0.29594	4.15	0.0886752	3.624	289.333	1.2439
F1-157	55.1	16.51	0.299637	5.23	0.0949183	3.677	296.333	1.33333
D1-84	52	16.47	0.316731	5.26	0.101154	4.092	272.667	1.30952
E2-69	55.4	16.38	0.295668	5.53	0.0998195	2.702	291.333	1.38095
E1-1	54.6	15.65	0.28663	5.81	0.10641	4.284	341.333	1.33333
F3-104	54.5	16.15	0.29633	5.2	0.0954128	3.548	285.333	1.30952
D3-38	49.2	14.31	0.290854	5.37	0.109146	3.358	305.333	1.31707
E2-38	54.5	16.3	0.299083	4.57	0.0838532	2.544	269	1.33333
E2-178	45	13.55	0.301111	3.58	0.0795556	1.314	210.333	1.38462
D2-169	43.9	13.39	0.305011	4.51	0.102733	3.475	297.333	1.39474
F3-44	49.8	15.33	0.307831	5.43	0.109036	4.204	321	1.375
F2-17	46.5	14.33	0.308172	3.8	0.0817204	2.671	258.333	1.325
F1-21	48.8	14.51	0.297336	5.06	0.103689	3.878	282	1.425
F1-67	55.9	16.41	0.29356	5.17	0.0924866	3.413	290.667	1.35714
F1-76	50.7	14.61	0.288166	3.56	0.070217	1.303	198.667	1.31707
E2-139	46.4	13.99	0.301509	4.34	0.0935345	2.398	261	1.41026
E1-18	49.3	14.48	0.293712	5.08	0.103043	4.193	314.333	1.375
D1-52	47	13.77	0.292979	4.83	0.102766	1.785	295	1.26829
E3-106	52.6	16.6	0.315589	6.37	0.121103	3.672	299.667	1.39024
D1-16	45.2	13.47	0.298009	5.17	0.114381	3.486	329.333	1.30952
F3-16	46.9	14.5	0.309168	4.42	0.0942431	3.381	287	1.35
E3-83	46.8	14.04	0.3	3.74	0.0799145	1.916	227	1.41026
F1-80	48.5	14.59	0.300825	5.18	0.106804	4.853	331.667	1.35
E2-131	45.1	14.42	0.319734	4.32	0.0957871	3.318	280.333	1.3
F2-8	46.8	14.43	0.308333	3.78	0.0807692	2.78	265	1.3
E3-54	56	16.78	0.299643	5.28	0.0942857	2.998	283	1.41463
F1-44	41.3	13.22	0.320097	3.43	0.0830508	3.197	276.667	1.43243
F2-9	48.9	14.65	0.299591	4.87	0.099591	2.697	301.667	1.3
F1-96	49	14.77	0.301429	4.9	0.1	4.215	308	1.4359
D1-25	44.8	13.35	0.297991	5.25	0.117188	3.282	315.667	1.33333
E3-110	55.4	16.85	0.304152	5.87	0.105957	1.991	332.333	1.41463
D2-149	48.7	14.89	0.305749	4.84	0.099384	3.26	283.333	1.375
F3-45	48.9	14.87	0.30409	4.27	0.0873211	2.7	270	1.375
F2-111	49	14.29	0.291633	5.27	0.107551	4.242	327	1.34146
D3-110	45.4	14	0.30837	4.16	0.09163	3.218	264.667	1.35897
E3-75	49.7	15.02	0.302213	4.21	0.0847082	2.879	250	1.425
F1-12	47.8	14.69	0.307322	5.16	0.10795	3.458	321	1.325
D3-21	46	13.99	0.30413	4.52	0.0982609	2.881	273.667	1.41026
F2-93	52.7	16.41	0.311385	5.34	0.101328	3.955	305.333	1.31707
D1-96	49.8	14.85	0.298193	5.3	0.106426	3.553	292.667	1.36585
D1-174	53.6	16.35	0.305037	5.5	0.102612	3.589	288.333	1.36585
D1-54	53.8	16.39	0.304647	5.92	0.110037	4.97	297	1.41463
F1-66	50.7	15.34	0.302564	4.96	0.0978304	3.533	294.333	1.425
F1-43	44.5	13.71	0.30809	4.64	0.10427	1.046	204.333	1.38462
D2-57	47	14.3	0.304255	4.74	0.100851	2.976	285.667	1.325
D1-131	43.2	13.23	0.30625	4.16	0.0962963	2.99	264.667	1.42105
E1-109	47.7	14.51	0.304193	5.43	0.113836	3.964	326.667	1.4359
D2-46	43.2	13.25	0.306713	4.53	0.104861	1.051	307	1.33333
E2-154	51.2	15.03	0.293555	4.35	0.0849609	2.05	232.667	1.34146
F3-84	46.1	14.53	0.315184	5.07	0.109978	3.538	302	1.325
F2-61	47.5	15.24	0.320842	4.87	0.102526	3.172	308.333	1.35
D2-113	45.5	13.93	0.306154	4.39	0.0964835	2.696	287.333	1.44737
F3-43	46.8	14.33	0.306197	4.97	0.106197	3.47	305.333	1.41026
E2-115	53.7	16.36	0.304655	5.4	0.100559	4.141	322	1.28571
D1-13	45.2	13.88	0.30708	4.54	0.100442	3.31	282	1.38462
F2-90	49.3	15.8	0.320487	4.31	0.0874239	2.461	253.667	1.4
D3-66	49.5	15.12	0.305455	5.13	0.103636	3.91	298.667	1.29268
D1-53	45.2	13.9	0.307522	4.67	0.103319	3.173	317	1.35897
D2-74	47.2	14.43	0.30572	4.35	0.092161	3.053	249.667	1.4359
D3-49	45.4	14.08	0.310132	4.74	0.104405	3.835	306	1.35897
D2-50	48.3	15.56	0.322153	4.54	0.0939959	2.727	272.667	1.35
F2-136	47.9	14.75	0.307933	4.24	0.0885177	1.475	253.667	1.325
E3-30	39.6	12.03	0.303788	4.73	0.119444	3.965	336	1.37838
D3-25	48.5	15.12	0.311753	5	0.103093	2.147	297.667	1.35
D2-54	44.9	13.91	0.3098	5.14	0.114477	4.105	316.667	1.35897
F1-175	46.4	14.31	0.308405	4.81	0.103664	4.476	312.667	1.275
E3-8	56.9	17.96	0.315641	5.87	0.103163	3.646	330.333	1.32558
E2-34	52.9	16.33	0.308696	4.74	0.089603	2.571	272.333	1.30952
F2-179	45.7	14.15	0.309628	4.37	0.0956236	3.404	276.667	1.325
E1-135	47.7	14.74	0.309015	4.6	0.0964361	2.391	287	1.36585
D3-167	48.7	15.24	0.312936	5.03	0.103285	3.03	300.667	1.35
E2-81	47.9	15.14	0.316075	4.79	0.1	3.368	271.667	1.35
D1-138	51.5	15.96	0.309903	4.9	0.0951456	2.377	273.667	1.38095
D2-92	54.2	16.84	0.310701	6.04	0.111439	3.718	331	1.35714
D3-77	47.3	15.02	0.317548	5.18	0.109514	4.143	322.667	1.35
D2-141	47.3	14.65	0.309725	4.75	0.100423	2.267	244.333	1.35
D2-131	52.6	16.17	0.307414	5.59	0.106274	2.751	298.667	1.45
F3-13	46.1	14.88	0.322777	3.96	0.0859002	2.264	253	1.325
F3-136	52.9	16.38	0.309641	5.75	0.108696	3.612	341.333	1.34146
D2-109	44.7	14.19	0.31745	4.01	0.0897092	1.522	228.667	1.44737
F1-83	49.4	15.27	0.309109	4.75	0.0961538	3.302	290.333	1.48718
F1-158	53.3	16.57	0.310882	5.8	0.108818	3.629	336	1.36585
D2-35	49.4	15.51	0.313968	5.07	0.102632	3.572	302	1.325
F2-149	51.3	16.18	0.3154	5.09	0.0992203	2.318	312	1.26829
D2-90	46.4	14.44	0.311207	5.17	0.111422	1.48	276.667	1.375
F2-169	51.4	15.98	0.310895	5.26	0.102335	3.729	316.333	1.31707
E2-80	48.3	14.9	0.308489	3.95	0.0817805	2.026	251	1.375
D2-4	45.5	14.32	0.314725	5.15	0.113187	2.194	300.333	1.41026
D2-107	50.1	15.92	0.317764	5.66	0.112974	3.805	319.333	1.4
D2-144	45.8	14.34	0.3131	4.77	0.104148	3.347	279.333	1.35897
D1-152	48.2	15.19	0.315145	4.33	0.089834	1.554	242	1.46154
F1-6	46.2	14.42	0.312121	4.25	0.0919913	2.62	241	1.41026
D3-126	53.7	16.77	0.312291	5.18	0.0964618	2.159	278.333	1.39024
F2-53	52.2	16.73	0.320498	4.17	0.0798851	3.094	264.667	1.34146
F3-99	51.7	16.43	0.317795	5.19	0.100387	3.053	292	1.36585
D2-163	47.5	14.6	0.307368	4.32	0.0909474	1.928	242	1.31707
D2-124	42.1	12.98	0.308314	4.46	0.105938	3.048	252.333	1.41026
F2-78	50.6	16.1	0.318182	4.98	0.098419	2.867	277.333	1.2619
D3-175	46.6	14.86	0.318884	5.35	0.114807	2.767	338.667	1.38462
D1-110	49.2	15.78	0.320732	5.09	0.103455	3.31	286.667	1.375
D3-64	40.4	12.93	0.32005	3.97	0.0982673	1.867	259	1.34211
D1-29	48	15.12	0.315	5.59	0.116458	3.476	322	1.4359
F2-128	51.9	16.19	0.311946	4.61	0.0888247	2.423	259.667	1.31707
E1-43	52.5	16.67	0.317524	4.74	0.0902857	3.199	267.667	1.36585
D1-151	48.1	15.37	0.319543	5.21	0.108316	3.633	309.333	1.4359
F2-65	48.3	14.99	0.310352	4.89	0.101242	3.024	303	1.325
D1-91	43.7	14.08	0.322197	4.15	0.0949657	2.844	251	1.35897
E2-173	44.9	14.14	0.314922	4.34	0.0966592	2.047	270.333	1.325
D3-9	45.6	14.23	0.312061	4.67	0.102412	3.913	269.333	1.35
F3-71	47.2	15.23	0.322669	5.17	0.109534	4.85	333.333	1.325
D2-45	49.2	15.66	0.318293	4.69	0.0953252	3.566	275.333	1.375
E1-37	47.5	14.91	0.313895	4.14	0.0871579	3.314	276.333	1.29268
D2-179	51.6	16.26	0.315116	5.2	0.100775	4.002	309	1.2619
F3-7	45.4	14.79	0.325771	4.13	0.0909692	2.533	253.667	1.35
F2-76	49.7	15.97	0.321328	5.17	0.104024	3.951	311.667	1.425
D1-37	60.4	19.24	0.318543	6.37	0.105464	3.347	323.667	1.40476
D2-167	52.7	16.87	0.320114	4.92	0.0933586	2.755	268.333	1.38095
F1-74	40.5	12.99	0.320741	4.43	0.109383	4.361	317	1.43243
F2-101	41	13.11	0.319756	4.64	0.113171	3.59	319.667	1.31579
D3-166	53.2	17.05	0.320489	5.15	0.0968045	3.274	288	1.425
E2-94	42.8	13.95	0.325935	4.17	0.0974299	3.136	292	1.34211
E3-36	49.5	16.43	0.331919	5.79	0.11697	4.535	364	1.325
D1-38	53.2	17.11	0.321617	5.43	0.102068	3.282	303	1.39024
D3-59	50.6	16.37	0.323518	5.38	0.106324	3.191	334.667	1.375
E1-90	48.1	16.36	0.340125	5.46	0.113514	4.033	347.333	1.4359
D2-120	48.1	15.48	0.32183	4.72	0.0981289	3.243	279.667	1.31707
D1-140	54	17.29	0.320185	5.7	0.105556	3.589	312	1.35714
E1-8	51.9	16.62	0.320231	5.48	0.105588	3.653	298.667	1.425
D2-87	43.9	14.24	0.324374	4.77	0.108656	2.433	309.333	1.42105
F2-64	51.4	16.54	0.32179	5.04	0.0980545	3.361	260.333	1.34146
E2-98	45.2	14.48	0.320354	3.8	0.0840708	1.934	237.333	1.3
E3-13	45.8	14.76	0.322271	4.78	0.104367	2.748	310	1.33333
D2-99	46.4	14.88	0.32069	5.39	0.116164	2.049	310.667	1.38462
D2-26	44.5	14.14	0.317753	4.53	0.101798	3.378	268.333	1.35897
F3-52	50.6	16.23	0.320751	4.33	0.0855731	2.92	267.333	1.34146
E2-76	51.6	17.06	0.33062	4.95	0.0959302	3.344	268.667	1.36585
E1-52	45.4	14.62	0.322026	4.29	0.0944934	2.927	266.333	1.2619
E1-66	49	16.06	0.327755	5.11	0.104286	2.941	307.667	1.26829
F3-100	47.9	14.92	0.311482	5.31	0.110856	4.001	330.667	1.325
D3-148	42.9	14.14	0.329604	4.52	0.105361	2.84	305.667	1.36842
F3-65	51.7	17.34	0.335397	4.13	0.0798839	2.295	240.333	1.2619
E3-4	47.4	15.38	0.324473	4.41	0.093038	3.267	297.333	1.35
D1-64	43.4	14.24	0.328111	4.7	0.108295	3.493	280	1.33333
D1-172	43.9	14.25	0.324601	4.86	0.110706	3.386	299	1.42105
F1-82	41.6	13.81	0.331971	4.11	0.0987981	3.191	283.333	1.43243
D3-128	54	17.45	0.323148	5.24	0.097037	2.892	305.333	1.39024
D3-130	45.2	14.44	0.319469	4.2	0.0929204	1.558	259.667	1.38462
E2-41	46.6	15.09	0.32382	3.75	0.0804721	2.733	232	1.26829
E1-151	51.4	17.3	0.336576	4.83	0.0939689	3.671	289	1.375
F2-35	41.5	13.57	0.326988	4.59	0.110602	3.284	320.333	1.45946
D3-102	48.2	15.77	0.327178	4.22	0.0875519	2.181	262.667	1.29268
D2-19	45.8	15.16	0.331004	5.28	0.115284	2.429	301.667	1.52632
D1-163	51.9	17.03	0.328131	5.78	0.111368	2.191	313.667	1.39024
D1-73	46.1	15.08	0.327115	4.73	0.102603	3.274	319.333	1.375
F2-165	42.7	14.29	0.33466	4.06	0.095082	2.864	266.667	1.33333
F1-122	40.2	13.22	0.328856	4.53	0.112687	4.751	333.333	1.43243
D1-128	52.6	17.25	0.327947	4.53	0.0861217	2.926	254	1.80645
D1-46	46.3	15.61	0.337149	4.98	0.107559	3.005	300	1.35
D2-176	49.6	16.34	0.329435	4.13	0.0832661	1.744	218.667	1.4
D2-94	48.2	16.28	0.337759	4.47	0.0927386	1.575	241.333	1.48718
D1-95	52.7	17.36	0.329412	5.28	0.10019	1.878	275	1.36585
D1-2	50.8	16.76	0.329921	4.84	0.0952756	2.568	274	1.425
F3-15	49.4	16.4	0.331984	4.69	0.0949393	3.409	286.333	1.375
D1-90	51	16.9	0.331373	5.02	0.0984314	3.313	275.333	1.36585
F3-67	43.9	14.64	0.333485	4.47	0.101822	3.738	300.667	1.25
F2-34	58.2	19.43	0.333849	6.23	0.107045	3.668	320.333	1.4878
E1-21	43.6	14.46	0.331651	4.75	0.108945	4.568	332	1.36842
E2-146	48.4	15.76	0.32562	4.17	0.086157	2.427	265.333	1.375
D1-92	48	15.92	0.331667	4.6	0.0958333	2.731	266.333	1.4359
E2-138	45.8	15.67	0.34214	4.54	0.0991266	3.375	275	1.35
E3-130	46.8	15.6	0.333333	4.76	0.101709	3.591	319	1.41026
D3-20	46.3	15.8	0.341253	4.73	0.10216	3.616	297.667	1.35
F1-141	49.7	16.43	0.330584	5.12	0.103018	4.603	325	1.4
D2-86	44.5	14.78	0.332135	4.16	0.0934831	2.931	247.667	1.38462
D2-66	42.7	14.12	0.330679	4.27	0.1	3.113	259	1.33333
D2-59	43.2	14.65	0.33912	5.21	0.120602	3.741	322	1.33333
D3-5	50.6	17	0.335968	5.84	0.115415	2.787	302	1.4
F2-160	57.4	19.41	0.338153	5.92	0.103136	3.595	313.667	1.32558
F2-22	47.5	15.91	0.334947	4.68	0.0985263	3.233	308.667	1.375
F3-161	47.6	15.96	0.335294	5.11	0.107353	2.843	297	1.325
D2-85	53.5	17.91	0.334766	5.7	0.106542	4.347	320	1.45
F3-103	44	15.04	0.341818	3.8	0.0863636	2.022	231.667	1.33333
D2-108	49.2	16.74	0.340244	4.31	0.0876016	1.599	226.333	1.4
D1-68	45	14.92	0.331556	4.56	0.101333	2.471	282.333	1.3
D2-68	45.4	15.64	0.344493	4.88	0.107489	2.845	295.333	1.35897
D1-44	50.9	17.38	0.341454	4.39	0.0862475	1.432	310	1.36585
F2-109	47.3	15.91	0.336364	3.43	0.0725159	1.997	219.333	1.35
D2-29	49.9	16.79	0.336473	4.43	0.0887776	2.781	239.667	1.4
F1-49	53.5	17.9	0.334579	4	0.0747664	1.702	296.667	1.33333
F2-43	39.1	15	0.383632	4.09	0.104604	3.253	264.667	1.29268
D1-126	45.3	15.72	0.34702	4.85	0.107064	3.328	292.667	1.4359
E2-136	45	15.01	0.333556	3.72	0.0826667	2.584	235.667	1.325
F2-41	49.5	16.99	0.343232	5.2	0.105051	4.354	312.333	1.4
D3-157	50.6	16.92	0.334387	4.48	0.0885375	3.52	253	1.36585
E3-102	47.7	17.45	0.365828	3.91	0.0819706	1.56	233.333	1.375
D3-31	55.1	19.28	0.349909	6.23	0.113067	1.533	300.333	1.43902
E3-87	47.7	16.29	0.341509	4.1	0.0859539	2.016	244	1.375
D2-48	45.4	15.46	0.340529	5.18	0.114097	3.299	318.333	1.35
D1-144	48.8	16.82	0.344672	5.25	0.107582	3.581	298.333	1.35
E1-161	45.5	15.25	0.335165	4.55	0.1	2.462	296.333	1.26829
D2-174	49.2	16.8	0.341463	4.97	0.101016	3.007	291.333	1.375
D2-155	41.8	14.43	0.345215	3.88	0.092823	1.688	224.333	1.41026
D3-36	44.6	15.45	0.346413	5.01	0.112332	4.544	326	1.33333
D1-162	44.3	15.27	0.344695	4.72	0.106546	3.659	297.333	1.4359
D2-101	41.7	14.61	0.35036	3.43	0.0822542	1.592	215.667	1.39474
D2-134	42	14.51	0.345476	4.85	0.115476	3.799	305	1.25
D2-135	50.5	16.87	0.334059	5.69	0.112673	1.744	306.667	1.35714
D2-117	41.9	14.09	0.336277	4.92	0.117422	4.275	312.333	1.48649
F1-18	50.8	17.13	0.337205	5.18	0.101969	3.725	308	1.31707
F2-81	41.2	14.21	0.344903	3.8	0.092233	3.1	262.333	1.31579
D1-121	55.1	19.05	0.345735	4.98	0.0903811	2.977	262	1.35714
D2-166	49.4	17.77	0.359717	4.86	0.0983806	3.284	300	1.29268
E1-111	45.7	15.57	0.3407	4.78	0.104595	2.67	315.333	1.275
F2-106	44.4	15.37	0.346171	4.85	0.109234	3.333	308	1.33333
E2-157	46.3	16.15	0.348812	4.06	0.087689	2.229	240.333	1.35
D2-146	44.7	16.11	0.360403	4.25	0.0950783	3.804	263.333	1.3
F2-167	35.6	12.5	0.351124	3.84	0.107865	2.612	255	1.3
D3-179	57.4	19.33	0.33676	5	0.087108	2.46	276.667	1.40476
E2-101	47.65	16.44	0.344579	4.175	0.087618	2.5615	252.833	1.32143
F1-84	45.3	16.04	0.354084	3.97	0.087638	2.915	252.333	1.35897
E1-39	53.7	19.19	0.357356	5.6	0.104283	3.776	312.667	1.33333
F1-86	48.3	17.3	0.358178	4.03	0.0834369	2.675	237.667	1.375
D2-106	53.6	19.47	0.363246	4.58	0.0854478	2.034	248.667	1.41463
E2-90	49.6	18.07	0.364315	4.18	0.0842742	2.692	242	1.29268
E2-9	48.3	12.63	0.261491	3.99	0.0826087	1.881	243.667	1.29268
D1-137	51.3	11.5	0.224172	4.32	0.0842105	2.626	300.667	1.36585
F1-171	51.3	12.79	0.249318	5.57	0.108577	3.611	328.333	1.29268
E2-91	54.7	14.49	0.264899	4.96	0.0906764	2.966	272.333	1.35714
D1-158	57.6	13.75	0.238715	5.66	0.0982639	3.364	299.333	1.5122
E3-131	54.4	13.1	0.240809	5.76	0.105882	3.79	354.333	1.2439
F3-41	48.9	13.55	0.277096	4.39	0.0897751	1.276	254.667	1.29268
E1-55	56	15.45	0.275893	5.49	0.0980357	3.509	306	1.35714
F3-3	44.4	11.97	0.269595	4.17	0.0939189	1.795	253.667	1.35897
E1-81	46.9	13.19	0.281237	4.78	0.101919	3.698	301	1.275
E3-12	53.9	14.74	0.273469	5.11	0.0948052	3.57	284.333	1.30952
F3-110	45.3	12.37	0.273068	5.45	0.120309	3.679	355.333	1.33333
E1-62	53.5	14.32	0.267664	6.18	0.115514	4.755	363.333	1.39024
E2-97	52.6	14.55	0.276616	4.54	0.0863118	1.581	256	1.28571
F2-4	47.8	13.88	0.290377	4.68	0.0979079	3.32	280.667	1.375
F3-17	49.8	13.95	0.28012	4.84	0.0971888	3.242	291.333	1.4
D1-133	51	11.67	0.228824	5.05	0.0990196	3.755	324.667	1.375
E1-126	45.5	13.03	0.286374	4.63	0.101758	3.227	303.333	1.275
E3-60	47.7	13.87	0.290776	5.32	0.11153	3.243	331.667	1.325
D2-67	38.6	10.95	0.283679	3.45	0.0893782	3.061	270.333	1.28947
F2-2	46.7	13.33	0.285439	4.99	0.106852	3.623	330.333	1.325
F3-96	50.5	13.92	0.275644	5	0.0990099	3.523	311.333	1.4
E3-90	49.8	13.74	0.275904	5	0.100402	2.624	287.667	1.26829
E2-113	52.6	14.99	0.284981	4.69	0.0891635	2.575	275	1.30952
F2-116	47.7	13.93	0.292034	4.7	0.0985325	4.27	278.667	1.375
E3-101	48.1	13.3	0.276507	5.3	0.110187	3.993	323.333	1.325
D3-15	51.6	14.1	0.273256	4.27	0.0827519	2.405	215	1.36585
E3-132	51.3	14.35	0.279727	5.23	0.101949	3.702	319	1.29268
D2-27	49.3	14.28	0.289655	4.66	0.0945233	2.808	290.667	1.35
D3-140	45.2	12.72	0.281416	5.08	0.112389	4.15	315.333	1.44737
F1-73	49.4	14.25	0.288462	5.18	0.104858	2.464	312	1.4
D1-139	47.1	13.26	0.281529	4.83	0.102548	4.193	313	1.325
D3-141	52.8	14.31	0.271023	4.46	0.0844697	1.386	241	1.41463
D3-131	49.3	14.19	0.28783	4.97	0.100811	3.433	300.333	1.375
F1-152	47	13.55	0.288298	4.69	0.0997872	4.347	311.333	1.41026
E1-180	50.2	14.09	0.280677	4.85	0.0966135	2.373	303.667	1.29268
E3-123	52.9	15.26	0.288469	4.85	0.0916824	1.653	275	1.36585
D3-4	44.8	13.3	0.296875	3.71	0.0828125	1.625	222	1.35897
D3-81	54.1	15.68	0.289834	5.9	0.109057	3.78	333	1.39024
F1-147	50.6	14.15	0.279644	5.32	0.105138	4.257	315.667	1.4
E3-43	51.3	14.74	0.287329	5.39	0.105068	4.296	326	1.375
D3-144	51.4	15.09	0.29358	4.24	0.0824903	3.059	305	1.36585
D2-72	50.4	14.55	0.28869	2.92	0.0579365	2.448	239	1.34146
D3-89	47.8	13.8	0.288703	4.86	0.101674	3.287	289.333	1.35
D3-108	55.1	15.99	0.2902	4.9	0.0889292	3.051	265.667	1.41463
E2-107	48.2	13.81	0.286515	3.98	0.0825726	2.449	244.667	1.29268
D3-161	47.5	13.76	0.289684	4.87	0.102526	3.777	301	1.31707
D2-81	49.8	14.6	0.293173	4.3	0.0863454	2.904	271	1.28571
E1-28	56.5	16.73	0.296106	5.47	0.0968142	3.805	323.333	1.38095
D1-145	51.1	14.88	0.291194	4.95	0.0968689	3.439	292	1.375
E3-28	47.6	13.94	0.292857	5.39	0.113235	4.361	333.333	1.38462
F1-157	53.6	15.7	0.29291	5.18	0.0966418	4.135	318	1.33333
D1-84	52.6	16.36	0.311027	5.38	0.102281	4.033	334.333	1.36585
E1-1	46.1	15.02	0.325813	4.82	0.104555	4.376	317	1.3
E3-35	53.4	15.94	0.298502	5.17	0.0968165	2.939	301.667	1.33333
E2-38	53.9	15.89	0.294805	4.91	0.0910946	2.918	291	1.30952
E2-178	45.9	13.47	0.293464	3.63	0.079085	1.632	224	1.35
D2-169	41.8	12.3	0.294258	5.33	0.127512	2.66	262	1.34211
F3-44	47.9	13.72	0.28643	5.61	0.117119	4.835	340	1.35
F2-17	47.7	13.7	0.287212	4.41	0.0924528	3.124	265.333	1.29268
F1-67	51.6	15.61	0.302519	5.4	0.104651	4.347	311.667	1.34146
F3-37	51.9	15.47	0.298073	4.95	0.0953757	4.304	284	1.34146
E2-139	44.4	13.11	0.29527	4.13	0.093018	2.744	270.333	1.26829
F3-70	49	14.8	0.302041	4.12	0.0840816	2.755	241.333	1.29268
E1-123	46.9	14.01	0.298721	4.73	0.100853	2.285	304.667	1.325
E3-106	51	14.5	0.284314	5.27	0.103333	3.916	330.333	1.4
E1-140	52	15.58	0.299615	5.01	0.0963462	2.279	284.667	1.475
F1-80	47.3	14.16	0.299366	5.07	0.107188	4.465	308	1.41026
F1-44	40.7	11.42	0.28059	3.68	0.0904177	3.316	249	1.52778
D1-43	50.7	14.5	0.285996	4.92	0.0970414	3.198	299.333	1.39024
E3-110	54.8	16.08	0.293431	6	0.109489	3.292	341.667	1.36585
D2-149	47.9	14.25	0.297495	4.53	0.094572	3.149	281.333	1.35
E3-31	45.7	12.54	0.274398	5.18	0.113348	2.919	335.667	1.35897
F3-45	49.8	15.33	0.307831	4.65	0.0933735	3.203	273.333	1.35
F2-111	46	14.27	0.310217	5.29	0.115	4.578	331.333	1.3
E3-75	49.2	14.85	0.301829	4.21	0.0855691	2.737	261	1.425
F1-12	51.1	15.05	0.294521	4.57	0.0894325	1.997	261.333	1.4
D3-21	43.9	13.28	0.302506	4.55	0.103645	2.15	278.667	1.4359
D1-96	50.2	15.4	0.306773	5.07	0.100996	4.613	326.333	1.375
D1-174	52.4	15.73	0.300191	5.04	0.0961832	3.352	300	1.34146
F1-178	44.6	14.08	0.315695	4.37	0.0979821	3.51	288.333	1.35897
D1-54	54.9	16.4	0.298725	6.43	0.117122	3.402	302	1.41463
F1-43	45.6	14.1	0.309211	4.5	0.0986842	2.767	292.333	1.4359
F2-168	56.6	17.34	0.30636	5.72	0.10106	4.344	310.333	1.41463
D1-131	44.8	13.57	0.302902	4.13	0.0921875	3.08	285.333	1.38462
E3-62	53	16.35	0.308491	5.49	0.103585	4.975	316.667	1.34146
E2-154	47.9	15.28	0.318998	5.34	0.111482	3.066	313	1.275
F2-153	52.9	16.12	0.304726	5.52	0.104348	3.177	320.667	1.34146
D2-113	50.3	15.16	0.301392	4.86	0.0966203	2.622	269	1.36585
E2-75	45.8	14.4	0.31441	4.68	0.102183	3.882	304.333	1.325
F1-135	38.1	11.78	0.309186	4.15	0.108924	4.367	294.667	1.38889
F2-90	47.1	13.82	0.293418	5.11	0.108493	3.972	320.667	1.35
D3-66	48.4	14.91	0.308058	5.12	0.105785	3.683	319.667	1.325
E3-30	44.7	13.49	0.30179	4.38	0.0979866	3.308	292.667	1.48649
E1-131	46.4	14.33	0.308836	5.39	0.116164	3.448	327	1.54054
F2-179	48.2	14.31	0.296888	5.08	0.105394	3.363	303.333	1.41026
D3-167	49.5	15.15	0.306061	5.09	0.102828	3.267	301	1.29268
E2-81	46.1	13.93	0.302169	4.58	0.0993492	3.296	300.333	1.3
D3-127	55.5	17.18	0.30955	5.27	0.094955	2.854	289.667	1.41463
D3-77	50.9	15.39	0.302358	5.66	0.111198	3.943	331	1.35
D1-4	44.8	13.88	0.309821	4.17	0.0930804	2.505	265.667	1.35897
F2-149	52.9	15.76	0.297921	5.14	0.0971645	3.424	290.667	1.2619
D2-103	57.3	17.48	0.305061	3.67	0.0640489	3.83	296.667	1.35714
D1-152	52.7	15.99	0.303416	4.49	0.0851992	2.2	238.333	1.39024
F2-53	52.9	16.1	0.304348	5.1	0.0964083	2.975	286.333	1.28571
F3-99	49.5	15.21	0.307273	4.72	0.0953535	3.06	279.333	1.31707
D2-163	48.6	15.09	0.310494	4.67	0.0960905	1.825	284	1.375
D2-124	44.4	14.12	0.318018	3.81	0.0858108	2.32	281	1.47368
D3-175	47.3	14.63	0.309302	3.66	0.0773784	1.098	183	1.35897
D1-110	47.7	14.48	0.303564	5.13	0.107547	3.665	333	1.325
F2-128	51.2	15.98	0.312109	4.49	0.0876953	2.592	258.667	1.34146
D1-151	50.5	15.8	0.312871	5.26	0.104158	3.959	315	1.34146
D1-91	43	13.45	0.312791	4.29	0.0997674	2.854	261.667	1.33333
E2-173	44.8	14.09	0.314509	4.46	0.0995536	2.781	284.667	1.275
D3-9	44.8	14.76	0.329464	4.2	0.09375	3.688	291	1.38462
D3-158	46.1	14.57	0.316052	4.82	0.104555	3.89	309.667	1.38462
D2-45	50.4	15.9	0.315476	4.34	0.0861111	3.016	263.667	1.4
E1-37	44.5	14.17	0.318427	4.09	0.0919101	3.366	285.667	1.30769
F3-7	45.9	14.2	0.309368	3.99	0.0869281	2.36	224	1.38462
F2-76	51.5	15.74	0.305631	5.37	0.104272	4.635	323.333	1.45
F2-1	48.8	14.87	0.304713	4.64	0.095082	2.811	274.667	1.4
D3-120	53.1	16.93	0.318832	4.35	0.0819209	1.067	263	1.36585
E2-94	43.1	13.34	0.309513	4.05	0.0939675	3.451	280	1.38462
D1-159	53.3	17.03	0.319512	5.24	0.0983114	2.79	301	1.45
D1-38	54.6	17.36	0.317949	5.39	0.0987179	2.948	324.333	1.39024
E1-90	44.4	13.23	0.297973	4.84	0.109009	3.679	309.333	1.35897
D2-120	49.3	15.63	0.317039	3.44	0.0697769	2.94	286.333	1.35
D2-87	44.8	14.17	0.316295	4.84	0.108036	3.545	288	1.39474
D2-26	44.7	14.05	0.314318	4.29	0.0959732	3.769	281.333	1.38462
D2-73	44	14.31	0.325227	3.95	0.0897727	1.973	231	1.375
D1-146	45.8	14.99	0.327293	5.17	0.112882	3.108	345.333	1.41026
E2-114	51.5	16.56	0.321553	4.53	0.0879612	2.774	251.333	1.31707
E1-66	48.9	15.51	0.317178	5.19	0.106135	3.288	319.667	1.325
F3-100	46.5	15.41	0.331398	4.28	0.092043	3.093	251	1.325
D3-148	44.6	14.22	0.318834	4.52	0.101345	3.586	312.667	1.33333
F3-65	49.8	15.53	0.311847	4.57	0.0917671	2.764	260	1.26829
D1-172	45.7	14.37	0.314442	4.89	0.107002	3.855	317.667	1.44737
D3-130	43.2	14.39	0.333102	3.99	0.0923611	1.871	249	1.35897
E1-41	44.1	14.38	0.326077	4.87	0.110431	4.37	310.667	1.33333
D1-73	47.1	15.22	0.323142	4.46	0.0946921	3.5	290.333	1.35
F2-165	43.3	13.99	0.323095	5.42	0.125173	4.602	362.333	1.33333
D1-46	47.6	15.3	0.321429	5.22	0.109664	3.479	334	1.38462
D2-176	48.8	16.06	0.329098	4.8	0.0983607	1.682	202	1.375
E2-156	46.2	15.27	0.330519	4.22	0.091342	2.332	247.667	1.3
D3-20	47.2	15.66	0.33178	4.86	0.102966	3.853	303	1.38462
F1-141	49.6	16.62	0.335081	5.01	0.101008	3.862	299	1.375
D2-86	45.9	15.31	0.333551	4.04	0.0880174	2.598	225	1.325
D1-153	54.1	18.04	0.333457	5.43	0.10037	4.327	307.667	1.36585
E1-150	43.3	13.68	0.315935	4.54	0.10485	2.046	291	1.42105
D2-66	43.8	14.85	0.339041	3.82	0.0872146	2.476	259.333	1.38462
D2-85	52.8	17.79	0.336932	3.63	0.06875	1.511	292.667	1.30233
D1-68	44.8	15.25	0.340402	4.32	0.0964286	2.379	281	1.3
D1-44	51.8	17.15	0.331081	4	0.0772201	2.634	225.333	1.34146
E3-98	48.7	16.4	0.336756	4.32	0.0887064	2.341	266.333	1.35
F1-49	54.1	18.47	0.341405	4.83	0.0892791	1.371	248	1.39024
F2-43	48.9	14.75	0.301636	4.57	0.093456	3.684	279	1.325
D1-126	46.9	15.6	0.332623	4.7	0.100213	3.023	312.667	1.375
E3-87	46.5	16.02	0.344516	4.52	0.0972043	3.251	288.333	1.35
D1-144	50.2	17.1	0.340637	4.79	0.0954183	4.052	318	1.31707
D2-174	49.5	16.93	0.34202	4.89	0.0987879	2.473	281	1.35
D2-96	49.3	16.87	0.342191	4.55	0.0922921	2.414	238.333	1.375
D3-36	43.7	14.81	0.338902	5.28	0.120824	4.066	372	1.33333
D2-101	43.4	14.38	0.331336	3.75	0.0864055	1.564	221.667	1.51351
D2-134	42.6	14.56	0.341784	3.59	0.0842723	3.312	307	1.28205
F1-18	42.5	14.97	0.352235	4.57	0.107529	3.683	294	1.36842
D2-166	51	17.48	0.342745	4.13	0.0809804	3.358	302.333	1.31707
D1-9	41.9	14.43	0.344391	4.36	0.104057	3.722	308.333	1.30769
D3-86	49.8	17.31	0.34759	5.14	0.103213	2.227	321	1.4
D3-93	43.4	15.11	0.348157	4.31	0.0993088	3.288	270.333	1.36842
F2-106	49.3	17.57	0.356389	5.26	0.106694	3.334	304.667	1.375
D3-17	45.1	14.87	0.329712	4.06	0.0900222	3.041	267	1.3
D2-146	44.3	15.01	0.338826	4.27	0.0963883	3.293	250.667	1.275
F1-36	51.5	17.67	0.343107	5.26	0.102136	4.103	310.333	1.34146
D3-179	51.4	18.91	0.367899	4.52	0.0879377	2.887	300	1.31707
F1-84	45.7	16.47	0.360394	3.83	0.0838074	1.684	220	1.38462

## Sheet: 53 week phenotype
id	a1	a2	a3	a4	a5	a6	a7	a8		a1	EW
D1-2	49.8	16.6	0.333333	5	0.100402	3.377	300	1.4		a2	YW
D1-4	45.85	13.8	0.301085	5.5	0.119956	4.7555	369.5	1.42848		a3	PY
F3-7	43.6	13.6	0.311927	4.2	0.0963303	2.558	252	1.44737		a4	ESW
E1-8	53.9	17.1	0.317254	5.5	0.102041	3.793	317	1.38095		a5	PSW
F2-9	53.1	15.9	0.299435	5.1	0.0960452	2.827	335	1.33333		a6	ESS
F3-17	58.4	14.2	0.243151	6	0.10274	3.358	351	1.84375		a7	EST
F3-22	46.6	13.8	0.296137	4.5	0.0965665	3.509	291	1.38462		a8	ESI
F3-27	60.6	16.9	0.278878	5.6	0.0924092	3.58	307	1.45238
D1-29	49.1	15.8	0.321792	5.6	0.114053	3.52	333	1.4359
D3-36	46.85	16.15	0.34471	5.25	0.11206	4.4165	353.5	1.3125
F2-43	52.4	15.6	0.29771	4.6	0.0877863	3.553	286	1.34146
D2-48	43.2	14.1	0.326389	5.1	0.118056	3.371	372	1.36842
F2-53	56.4	17.3	0.306738	5.8	0.102837	3.614	379	1.39024
D2-54	45.4	14.5	0.319383	4.6	0.101322	2.597	296	1.35897
D2-62	48	16.4	0.341667	4.3	0.0895833	2.167	240	1.46154
D2-66	47.3	15.7	0.331924	5	0.105708	4.085	317	1.29268
D3-71	46.4	14.7	0.31681	5.4	0.116379	4.079	376	1.3
D1-73	48.4	15.4	0.318182	4.9	0.10124	1.755	280	1.4
D1-52	50.3	15	0.298211	4.9	0.0974155	1.913	257	1.30952
D3-77	54	16.5	0.305556	6	0.111111	4.1	333	1.30952
F2-81	45.4	16.1	0.354626	4	0.0881057	3.216	255	1.275
E1-62	51.9	15.7	0.302505	5.2	0.100193	1.701	316	1.41463
F3-84	45.4	13.8	0.303965	5.1	0.112335	1.984	336	1.44737
E1-67	44.5	16.9	0.379775	4.8	0.107865	3.35	328	1.44737
F2-93	55.2	18	0.326087	5.6	0.101449	3.363	326	1.30952
D2-99	48.2	18.2	0.377593	5.7	0.118257	4.485	375	1.35
F3-100	44.3	14.6	0.329571	4.5	0.10158	3.468	286	1.33333
D3-102	50.2	16.2	0.322709	4.5	0.0896414	3.736	327	1.4
F3-110	47.4	14.6	0.308017	5.3	0.111814	4.01	333	1.3
D1-91	42.7	13.5	0.31612	4.25	0.0995316	2.3925	251.5	1.36842
E2-87	53	16.9	0.318868	5.4	0.101887	3.629	348	1.34146
E3-131	55.9	16.8	0.300537	6.2	0.110912	4.155	348	1.33333
D3-108	57.5	17	0.295652	5.8	0.10087	3.165	305	1.46341
D2-134	41.8	14.6	0.349282	4.8	0.114833	3.417	307	1.34211
E1-98	49.9	15.6	0.312625	5.9	0.118236	5.205	348	1.4
E1-100	50.5	16.1	0.318812	4.6	0.0910891	2.569	281	1.375
D2-141	49	16	0.326531	5.2	0.106122	2.687	300	1.38462
D1-146	48.2	15.3	0.317427	5.4	0.112033	4.753	352	1.5
E2-154	52.1	15.6	0.299424	5.9	0.113244	3.193	317	1.31707
E1-124	44.1	14.9	0.337868	3.7	0.0839002	3.318	245	1.39474
E1-126	47.2	14.4	0.305085	5.6	0.118644	3.79	332	1.3
D2-160	42.3	12.2	0.288416	4.8	0.113475	3.084	361	1.31579
F2-165	51.4	16.8	0.326848	5.3	0.103113	3.273	283	1.4
D3-167	50.1	15.9	0.317365	4.9	0.0978044	2.373	296	1.325
E2-172	49.6	13.6	0.274194	5.9	0.118952	3.598	360	1.375
D3-161	47.9	14	0.292276	5.3	0.110647	4.077	335	1.41026
F2-173	55.2	15.9	0.288043	5.6	0.101449	2.564	328	1.30952
D2-173	45.8	13.8	0.30131	4.9	0.106987	3.748	333	1.35897
D2-163	50.7	16.7	0.329389	4	0.0788955	2.785	235	1.34146
D1-174	59	17.3	0.29322	5.5	0.0932203	3.327	275	1.42857
E1-169	53.8	14.7	0.273234	6	0.111524	4.52	346	1.34146
F1-178	43.1	14.2	0.329466	4.6	0.106729	3.272	241	1.39474
D2-179	52.4	16.8	0.320611	5.1	0.0973282	3.54	278	1.31707
D3-177	46.6	16.4	0.351931	5.6	0.120172	3.708	327	1.3
D2-176	53.5	16.9	0.315888	4.5	0.0841121	2.467	219	1.5
D2-4	46.8	14.3	0.305556	5.5	0.117521	3.452	293	1.38462
D1-9	46.4	16.5	0.355603	4.5	0.0969828	3.534	300	1.38462
D1-10	46.6	14.6	0.313305	5	0.107296	3.61	236	1.44737
E3-13	43.5	13.5	0.310345	3.6	0.0827586	1.39	291	1.48649
D2-22	48.4	14.5	0.299587	4.5	0.0929752	3.18	292	1.325
D2-29	48.9	16.2	0.331288	4.8	0.0981595	3.507	303	1.4359
F3-34	55.3	16.4	0.296564	5.3	0.0958409	2.899	314	1.39024
F1-36	50.7	16.9	0.333333	5.2	0.102564	3.628	333	1.36585
F3-37	45.8	13.5	0.29476	4.7	0.10262	3.931	288	1.275
E3-28	45.5	14.7	0.323077	4.6	0.101099	3.284	248	1.275
D2-43	48.4	16.7	0.345041	4	0.0826446	1.783	248	1.325
D2-59	46.5	15.6	0.335484	5.4	0.116129	3.751	353	1.35897
E3-43	45	13.1	0.291111	5.2	0.115556	2.321	316	1.35897
F2-61	46.7	15.1	0.323475	4.9	0.104925	2.8505	277	1.31635
F1-63	44.4	13.9	0.313063	4.2	0.0945946	2.141	292	1.38462
F1-66	50.3	17.1	0.33996	5	0.0994036	3.902	336	1.53846
D2-61	49.7	14.9	0.299799	5	0.100604	3.328	301	1.34146
D2-74	43.4	14.1	0.324885	4.7	0.108295	3.55	302	1.39474
F2-77	45.55	13.1	0.287516	4.5	0.0987925	2.6985	287	1.39744
D2-81	51.9	15.5	0.298651	5.1	0.0982659	2.999	286	1.29268
F1-82	44.9	15.1	0.336303	4.1	0.091314	3.483	298	1.47368
E3-75	47.1	13.6	0.288747	4.7	0.0997877	3.638	324	1.4359
D2-109	48.5	15.8	0.325773	4.5	0.0927835	3.158	313	1.46154
F2-111	47	15	0.319149	5	0.106383	2.981	298	1.375
F3-111	48.9	16.3	0.333333	4.9	0.100204	4.016	390	1.375
E2-115	57.3	16.5	0.287958	6.9	0.120419	5.63	307	1.33333
E3-85	46.3	15.5	0.334773	5	0.107991	3.742	333	1.47368
F1-122	42.5	14.3	0.336471	4.1	0.0964706	3.173	283	1.48649
D2-103	50.4	15.1	0.299603	5.5	0.109127	4.397	320	1.29268
D2-105	51.5	15.2	0.295146	5.4	0.104854	3.737	320	1.425
E3-130	47	15	0.319149	4.6	0.0978723	1.588	300	1.5
D2-131	54.4	16.8	0.308824	5.6	0.102941	3.431	307	1.475
E3-132	51.5	15.1	0.293204	5.4	0.104854	4.067	335	1.36585
F1-135	40.2	12.7	0.31592	3.8	0.0945274	3.05	277	1.34211
E1-1	51	16.2	0.317647	5.8	0.113725	3.837	355	1.4
D1-2	50.8	16.7	0.32874	5.1	0.100394	2.776	268	1.425
F3-7	43.8	13.1	0.299087	4.1	0.0936073	3.049	235	1.39474
E1-8	54.8	18.5	0.337591	5.3	0.0967153	3.111	273	1.41463
F3-17	52.5	13.7	0.260952	5.5	0.104762	2.858	358	1.31707
F3-22	47.1	15	0.318471	4.5	0.0955414	2.806	300	1.38462
F3-27	63.6	16.5	0.259434	6.2	0.0974843	3.287	323	1.52381
D1-29	49.9	15.4	0.308617	6.1	0.122244	3.383	365	1.4359
D2-48	42.2	13.6	0.322275	4.6	0.109005	3.033	357	1.34211
F2-53	56.5	17.3	0.306195	5.9	0.104425	3.923	368	1.33333
D2-54	46.2	14.2	0.307359	4.8	0.103896	3.333	301	1.38462
D2-57	53.1	16.55	0.311643	5.55	0.10452	3.297	351	1.34146
F2-63	54.1	17.8	0.32902	4.6	0.0850277	2.247	239	1.475
D2-66	48.6	16	0.329218	5.1	0.104938	3.658	292	1.325
D3-71	46.6	13.2	0.283262	5.1	0.109442	4.112	362	1.38462
F3-71	50.7	16.4	0.323471	5.8	0.114398	4.567	345	1.35
D1-52	49.3	15.6	0.31643	4.9	0.0993915	1.659	289	1.35
F2-81	44.5	15.1	0.339326	3.8	0.0853933	2.764	258	1.30769
E1-62	53.4	15	0.280899	5.8	0.108614	1.262	390	1.41463
F3-84	44.5	13.3	0.298876	5	0.11236	2.295	326	1.45946
F2-93	55.1	17.7	0.321234	5.7	0.103448	3.511	332	1.28571
D2-99	58.7	17.1	0.291312	5.9	0.100511	2.77	321	1.38095
F3-110	46.4	13.7	0.295259	5.1	0.109914	4.083	338	1.3
D1-91	42.3	13	0.307329	3.6	0.0851064	2.415	246	1.34211
F1-123	53.9	16.5	0.306122	5.2	0.096475	3.874	302	1.36585
D2-124	43.3	13.5	0.311778	4.6	0.106236	3.214	312	1.44737
D3-108	56.2	15.9	0.282918	5.7	0.101423	4.031	328	1.41463
D2-134	41.3	13.7	0.331719	4.6	0.11138	3.429	312	1.31579
E1-98	49	14.7	0.3	5.7	0.116327	5.361	346	1.375
F2-136	51.4	15.9	0.309339	4.7	0.0914397	2.105	266	1.31707
D2-141	48.4	15.5	0.320248	5	0.103306	2.17	287	1.38462
D1-126	47.1	16.3	0.346072	4.9	0.104034	3.498	341	1.38462
D1-146	47.4	14.8	0.312236	5.2	0.109705	4.146	346	1.52632
D2-146	49.1	17.5	0.356415	4.7	0.095723	3.08	284	1.375
D2-151	52	14.9	0.286538	4.1	0.0788462	1.51	176	1.29268
E2-154	49.8	15.5	0.311245	6	0.120482	3.406	396	1.2381
E1-124	41.4	14.1	0.34058	3.2	0.0772947	1.129	218	1.36842
E1-126	50.2	15.2	0.302789	5.9	0.11753	4.423	307	1.35
E1-135	59	17	0.288156	5.4	0.0915254	2.3345	272.5	1.49419
D3-160	45.9	14.1	0.30719	5.6	0.122004	3.864	396	1.33333
F2-165	51.8	18.5	0.357143	5.6	0.108108	3.838	345	1.36585
D3-167	51.1	16.7	0.32681	4.8	0.0939335	2.345	290	1.35
E1-150	44.6	15.4	0.345291	4.7	0.105381	2.803	306	1.42105
E2-172	50.1	12.9	0.257485	6	0.11976	3.665	357	1.4
D3-161	50	14.8	0.296	5.5	0.11	4.236	333	1.4359
F2-173	58	16	0.275862	5.7	0.0982759	2.309	322	1.35714
D2-173	46.8	14.2	0.303419	5.2	0.111111	3.33	347	1.38462
E1-161	47.3	17.8	0.376321	3.6	0.0761099	1.292	205	1.4
D2-163	51.2	16.6	0.324219	4.4	0.0859375	2.011	213	1.375
E1-169	56.1	15	0.26738	6.2	0.110517	3.833	377	1.41463
D2-167	51.2	16.1	0.314453	4.7	0.0917969	3.204	284	1.45
F1-178	46.2	14.7	0.318182	3.8	0.0822511	2.286	190	1.47368
D2-179	56.2	17.3	0.307829	4.9	0.0871886	3.357	256	1.33333
D3-180	50.2	15.2	0.302789	4.4	0.0876494	0.676	247	1.375
D3-177	48.3	17.2	0.356108	5.4	0.111801	4.025	327	1.3
D2-176	49.6	16.1	0.324597	4.2	0.0846774	2.787	219	1.4
F3-1	52	14.4	0.276923	5.1	0.0980769	3.445	297	1.4
D2-4	49.8	15.1	0.303213	5.3	0.106426	3.083	298	1.375
D1-9	46.3	15.9	0.343413	4.6	0.0993521	3.249	280	1.35
E3-17	52.9	14.4	0.272212	5.9	0.111531	4.802	339	1.31707
D2-29	54.3	17.4	0.320442	4.4	0.0810313	3.141	225	1.41463
F3-34	55.2	16.9	0.306159	5.1	0.0923913	2.983	285	1.38095
F1-36	49.6	16.7	0.336694	4.7	0.0947581	3.67	280	1.375
F3-37	47.8	13.6	0.284519	4.3	0.0899582	2.607	255	1.375
D2-43	47.9	16.1	0.336117	4.1	0.085595	1.987	273	1.2439
D2-50	49	14.4	0.293878	5.1	0.104082	2.69	280	1.4359
D2-59	50.3	16.2	0.322068	5.3	0.105368	3.833	304	1.4
E3-43	48.1	14.5	0.301455	5.3	0.110187	3.242	335	1.41026
E3-45	49.7	16.1	0.323944	5.5	0.110664	4.669	350	1.21429
F1-63	43.6	14	0.321101	4.2	0.0963303	2.836	240	1.33333
F3-67	50.9	16.3	0.320236	4.5	0.0884086	3.164	286	1.2619
E3-51	49.1	15.5	0.315682	5	0.101833	2.63	305	1.375
D2-61	50.7	14.9	0.293886	4.7	0.0927022	3.591	261	1.4
D2-74	42.2	13.6	0.322275	4.2	0.0995261	2.755	259	1.36842
F2-77	45.6	12.8	0.280702	4.7	0.10307	3.037	293	1.35897
D2-81	49.7	15.5	0.311871	4.9	0.0985915	2.798	287	1.375
F1-82	43.8	14.4	0.328767	3.9	0.0890411	2.771	289	1.48649
D2-67	36.1	11.3	0.313019	2.9	0.0803324	1.364	197	1.38889
D1-92	49.2	16.1	0.327236	4.7	0.0955285	2.556	264	1.375
D1-96	49.1	14.3	0.291242	5.8	0.118126	4.501	396	1.35
E3-75	47.4	13.8	0.291139	4.7	0.0991561	3.534	336	1.5
D1-110	46.4	14.1	0.303879	4	0.0862069	1.779	283	1.325
D2-103	52.6	15.5	0.294677	5.2	0.0988593	3.558	321	1.34146
F2-123	47.3	13.4	0.283298	4.5	0.0951374	3.36	295	1.41026
E2-97	54.9	17	0.309654	5.3	0.0965392	2.989	288	1.36585
D1-2	48.8	16	0.327869	4.2	0.0860656	2.411	226	1.4359
D1-4	48.2	14.2	0.294606	5.9	0.122407	5.348	384	1.47368
F3-7	44.6	13.5	0.302691	3.9	0.0874439	3.305	246	1.44737
E1-8	53.9	17	0.315399	5.5	0.102041	3.661	298	1.45
F2-9	51.6	15.3	0.296512	4.9	0.0949612	3.257	296	1.375
F3-17	51.6	14.2	0.275194	5.4	0.104651	3.112	355	1.34146
F3-22	47	13.2	0.280851	4.5	0.0957447	3.254	282	1.38462
F3-27	56.7	15	0.26455	5.2	0.0917108	3.432	303	1.46341
D1-29	52.2	16	0.306513	5.9	0.113027	3.038	341	1.425
D3-36	48	13.6	0.283333	5.8	0.120833	5.092	367	1.3
F2-41	51.7	17	0.32882	5.5	0.106383	3.894	337	1.36585
F2-43	51.4	15.4	0.299611	4.6	0.0894942	3.905	328	1.31707
D2-48	43.7	14	0.320366	4.9	0.112128	3.218	353	1.30769
F2-53	55.8	16.3	0.292115	5.9	0.105735	3.879	322	1.39024
D2-54	47.4	14.5	0.305907	4.9	0.103376	2.902	313	1.44737
D2-62	50	16.9	0.338	5.3	0.106	3.076	297	1.48718
F2-63	52.6	16.9	0.321293	4.6	0.0874525	2.327	274	1.48718
D3-71	46	13.4	0.291304	4.9	0.106522	3.828	351	1.33333
F3-71	55	17.7	0.321818	5.7	0.103636	4.222	301	1.36585
D1-52	48.6	15.1	0.3107	5	0.102881	1.92	300	1.325
D3-77	52.2	15.1	0.289272	5.9	0.113027	3.934	325	1.375
F2-81	44.3	14.7	0.331828	4	0.0902935	3.114	263	1.28205
E1-67	44.8	16.3	0.363839	4.5	0.100446	1.551	283	1.44737
F2-93	55.1	17.4	0.315789	5.6	0.101633	3.661	339	1.30952
E1-69	57.4	16.2	0.28223	5.8	0.101045	2.897	319	1.35714
F3-100	44.9	14.7	0.327394	4.9	0.109131	3.598	316	1.33333
D3-102	50.3	15.9	0.316103	4.4	0.0874751	3.484	297	1.375
F3-103	45.6	15.5	0.339912	4.6	0.100877	3.375	316	1.38462
F3-110	46.6	13.3	0.285408	5.7	0.122318	4.146	368	1.275
D1-91	43.1	13.3	0.308585	4.2	0.0974478	3.004	278	1.34211
F1-123	48.9	15.3	0.312883	5.2	0.106339	3.659	319	1.375
E2-87	52.5	17.3	0.329524	5.6	0.106667	4.853	335	1.31707
D2-124	42.5	12.9	0.303529	4	0.0941176	2.392	297	1.51351
E3-131	57.7	16.9	0.292894	6.3	0.109185	4.061	335	1.30952
D3-108	59	16.9	0.286441	5.7	0.0966102	3.243	304	1.46341
D2-134	41.6	13.2	0.317308	4.8	0.115385	3.475	308	1.25641
F2-136	53	15.6	0.29434	4.3	0.0811321	1.479	262	1.39024
F1-141	53.4	18.1	0.338951	5.6	0.104869	4.066	313	1.475
D1-126	47.9	16.5	0.344468	5.1	0.106472	3.382	328	1.41026
D1-146	51.1	15.6	0.305284	5.4	0.105675	4.029	327	1.53846
D2-146	48	15.1	0.314583	4.7	0.0979167	3.239	298	1.38462
E2-150	55.9	18.9	0.338104	5.1	0.0912343	2.687	264	1.41463
D2-151	51	16.5	0.323529	3.5	0.0686275	1.524	181	1.29268
E1-126	48.1	14.5	0.301455	5.1	0.106029	3.026	310	1.3
D2-160	42.9	12.7	0.296037	4.5	0.104895	2.145	368	1.34211
D3-160	48.6	15.1	0.3107	5.2	0.106996	2.979	345	1.325
F1-163	44.5	14.1	0.316854	4.6	0.103371	3.557	296	1.30769
F2-165	50	17.7	0.354	4.9	0.098	2.943	286	1.375
D3-167	53.1	17.3	0.3258	5.1	0.0960452	2.898	285	1.36585
F2-173	56.9	16	0.281195	5.1	0.0896309	1.847	269	1.39024
D2-173	50.5	15.2	0.30099	5.1	0.10099	3.282	297	1.4
E2-171	55.2	16.5	0.298913	5	0.0905797	1.796	294	1.475
D2-163	51.1	16.5	0.322896	4.3	0.0841487	2.286	242	1.375
E1-167	57.9	17.1	0.295337	4.9	0.0846287	2.394	264	1.40476
D1-174	55.6	16.5	0.296763	5.2	0.0935252	3.334	289	1.35714
E1-169	57	15.1	0.264912	6	0.105263	4.401	300	1.41463
D2-167	50.5	15.5	0.306931	4.5	0.0891089	3.024	283	1.425
D2-176	49.7	15.8	0.317907	4	0.0804829	2.714	217	1.4
E3-12	47.8	14	0.292887	4.2	0.0878661	2.74	266	1.325
E3-13	43.5	13.4	0.308046	4.6	0.105747	3.811	307	1.45946
D2-22	49	14.3	0.291837	5.1	0.104082	3.844	316	1.325
F3-34	52.6	14.5	0.275665	5.1	0.0969582	3.126	292	1.4
F1-36	48.9	16.5	0.337423	4.9	0.100204	3.365	298	1.375
F3-37	45	13.9	0.308889	4.4	0.0977778	3.447	319	1.33333
E3-28	45.7	14.3	0.31291	4.5	0.0984683	3.451	279	1.33333
D2-43	49.2	15.9	0.323171	4.4	0.0894309	2.296	283	1.35
D2-50	51	15.3	0.3	5.2	0.101961	1.799	231	1.48718
F2-61	49.85	16.6	0.33302	5.7	0.114343	3.899	328	1.4125
E3-45	54.6	15.7	0.287546	5.5	0.100733	4.184	307	1.34146
F1-63	45.6	14.5	0.317982	4.1	0.0899123	2.28	226	1.35897
F1-66	48.5	15.4	0.317526	4.8	0.0989691	3.628	306	1.4359
F3-67	47.2	15.6	0.330508	4.7	0.0995763	3.76	315	1.275
D2-61	50.4	15	0.297619	4.7	0.093254	2.751	270	1.375
F2-77	46.4	12.9	0.278017	4.8	0.103448	3.347	222	1.35897
D2-81	49.3	15.1	0.306288	4.7	0.0953347	3.051	275	1.325
F1-82	44.4	14.4	0.324324	4.2	0.0945946	2.772	310	1.54054
D1-92	49.6	16.2	0.326613	4.7	0.0947581	2.916	287	1.375
F3-96	53.6	15.8	0.294776	5.4	0.100746	2.913	313	1.39024
E3-75	45.1	12.7	0.281596	4.8	0.10643	3.482	311	1.44737
D2-109	45.1	15.1	0.334812	5.4	0.119734	4.52	374	1.44737
D1-110	45.8	13.8	0.30131	4.6	0.100437	2.859	329	1.30769
F3-111	48.5	16.8	0.346392	5.5	0.113402	4.101	351	1.325
E3-85	51.5	17.3	0.335922	4.5	0.0873786	3.281	259	1.46154
F1-122	42.1	14	0.332542	3.8	0.0902613	3.146	268	1.45946
D2-105	52	15.4	0.296154	5.4	0.103846	2.977	303	1.425
D2-131	52.6	15.7	0.298479	5.4	0.102662	3.096	308	1.53846
E3-132	50.8	15.2	0.299213	5.7	0.112205	4.377	366	1.26829
F1-135	35.6	11.3	0.317416	3.7	0.103933	3.916	310	1.36111
D1-136	45.6	14.6	0.320175	3.7	0.0811404	1.672	211	1.3
D1-4	46.4	13.75	0.296336	5.64	0.121552	5.111	389	1.44737
F3-7	43	13.14	0.305581	3.91	0.0909302	2.225	250	1.36842
F2-9	55.8	16.28	0.291756	5.14	0.0921147	2.892	295	1.39024
F3-17	51.4	14.28	0.277821	5.29	0.102918	4.208	369	1.4
F3-22	46.6	13.43	0.288197	4.39	0.094206	2.74	292	1.38462
D3-36	48.5	16.2	0.334021	5.7	0.117526	2.422	360	1.325
F2-41	49.8	17.53	0.352008	4.54	0.0911647	3.164	351	1.375
F2-43	52.3	14.76	0.282218	4.75	0.0908222	3.773	359	1.34146
D2-48	43.15	13.63	0.315916	4.695	0.108806	2.255	342.5	1.33772
F2-53	58.6	18.74	0.319795	5.87	0.100171	4.433	325	1.40476
D2-54	47.2	14.85	0.314619	4.87	0.103178	3.121	316	1.325
D2-57	53.5	16.68	0.311776	4.54	0.0848598	3.522	237	1.31707
D2-62	47.8	16.15	0.337866	4.64	0.0970711	2.884	338	1.52632
D2-66	48.4	15.96	0.329752	4.81	0.0993802	3.474	299	1.325
F3-71	51.8	17.47	0.337259	5.52	0.106564	4.531	312	1.375
D1-73	51.7	15.94	0.308317	4.75	0.0918762	2.442	263	1.325
D3-77	51.9	15.01	0.28921	5.66	0.109056	3.562	344	1.31707
F2-81	44.8	15.12	0.3375	4.01	0.0895089	3.228	246	1.33333
F3-84	46.1	13.655	0.296415	4.705	0.102061	1.9845	275.5	1.49467
F2-93	52.7	16.2	0.3074	5.58	0.105882	3.112	343	1.31707
E1-69	58.6	16.97	0.28959	6.11	0.104266	2.916	331	1.30233
D3-102	50.3	15.8	0.314115	4.37	0.0868787	3.31	284	1.375
F3-103	44.45	16.04	0.360913	4.185	0.0941507	2.454	277	1.34615
F3-110	50.9	15.01	0.294892	5.58	0.109627	3.787	318	1.375
D1-91	43.4	13.49	0.310829	4.36	0.100461	2.944	280	1.39474
E3-115	65.9	19.62	0.297724	5.09	0.0772382	1.153	237	1.36364
E2-87	50.2	19.88	0.396016	5.35	0.106574	4.577	347	1.29268
D2-124	43.6	13.69	0.313991	4.75	0.108945	3.141	312	1.48649
E3-131	53.9	16.86	0.312801	6.59	0.122263	4.669	359	1.34146
D2-134	43.7	14.21	0.325172	5.01	0.114645	3.985	309	1.33333
E1-98	49.8	15.4	0.309237	5.84	0.117269	5.191	344	1.46154
F2-136	51.1	15.69	0.307045	4.5	0.0880626	2.623	262	1.35
F1-141	53.3	18.07	0.339024	5.53	0.103752	4.899	321	1.45
D2-141	48.3	15.07	0.312008	5.36	0.110973	2.818	315	1.35897
D1-126	46.5	15.43	0.331828	5.11	0.109892	3.41	335	1.35897
D1-146	48.6	15.51	0.319136	5.2	0.106996	3.975	333	1.55263
D2-146	48.6	15.07	0.310082	5.1	0.104938	2.91	32	1.375
D3-150	47.1	15.62	0.331635	4.75	0.100849	2.825	267	1.4359
E2-154	49.1	15.82	0.3222	5.58	0.113646	3.642	362	1.26829
E1-124	42.6	14.61	0.342958	3.5	0.0821596	1.254	220	1.33333
E1-126	52.5	16.73	0.318667	5.48	0.104381	2.621	306	1.31707
F1-157	57.6	16.57	0.287674	5.74	0.0996528	4.797	310	1.46341
E1-135	57.2	16.185	0.282948	5.865	0.102535	3.032	303	1.5064
D2-160	44.6	13.39	0.300224	5.24	0.117489	2.698	364	1.33333
D3-160	49.2	15.97	0.324593	5.52	0.112195	3.242	338	1.325
F2-165	50.7	18.08	0.356607	5.27	0.103945	3.577	291	1.4
D3-167	53.8	17.25	0.320632	5.31	0.0986989	3.151	294	1.36585
E2-172	58.8	14.31	0.243367	5.36	0.0911565	3.271	286	1.36585
D3-161	48.6	14.14	0.290947	5.27	0.108436	4.111	293	1.4359
F2-173	55.1	16.27	0.295281	5.56	0.100907	2.08	310	1.33333
D2-173	47	14.25	0.303191	5.19	0.110426	3.142	344	1.41026
E2-171	53	15.53	0.293019	5.24	0.0988679	2.196	288	1.475
D2-163	50.7	16.1	0.317554	4.31	0.0850099	1.795	212	1.375
E1-167	54.3	17.89	0.329466	5.6	0.103131	3.529	320	1.39024
D1-174	61.4	17.37	0.282899	5.21	0.0848534	2.992	272	1.42857
D2-167	51.4	16.08	0.31284	4.86	0.0945525	2.942	293	1.4
F1-178	45.8	15.21	0.332096	4.61	0.100655	3.253	258	1.33333
D2-179	52.7	17.09	0.324288	5.07	0.0962049	3.121	302	1.2381
D3-177	48.5	17.23	0.355258	5.51	0.113608	3.888	335	1.3
D2-176	48.4	14.94	0.308678	3.88	0.0801653	2.507	214	1.48718
F3-1	50.8	14.5	0.285433	4.26	0.0838583	1.416	218	1.4
D2-4	49.1	15.39	0.313442	4.29	0.0873727	1.473	263	1.375
D1-10	46.5	14.44	0.310538	4.43	0.0952688	1.466	285	1.4359
D2-22	48.1	14.05	0.2921	4.81	0.1	3.41	262	1.325
D2-29	48.4	15.29	0.315909	4.13	0.0853306	3.3	217	1.35897
F3-34	53.8	16.79	0.312082	4.18	0.0776952	2.535	239	1.41463
F3-37	45.3	14.42	0.318322	3.97	0.087638	2.638	274	1.33333
E3-28	46.7	14.76	0.31606	4.9	0.104925	3.222	303	1.38462
D2-46	47.5	14.19	0.298737	3.7	0.0778947	0.789	270	1.375
D2-50	50.9	15.58	0.30609	4.61	0.0905697	1.923	257	1.425
D2-59	47.9	15.7	0.327766	5.1	0.106472	3.593	310	1.41026
F2-61	50.4	17.23	0.341865	4.64	0.0920635	2.581	271	1.425
F1-63	42.1	14.45	0.34323	2.93	0.0695962	0.904	190	1.34211
F2-64	50.4	17.32	0.343651	2.93	0.0581349	1.646	210	1.375
F1-66	48.3	15.5	0.320911	3.63	0.0751553	3.125	300	1.46154
D2-74	44.3	14.53	0.327991	5.01	0.113093	3.233	309	1.35897
F2-77	45.3	13.03	0.287638	4.56	0.100662	3.019	297	1.35897
F1-82	44	14.51	0.329773	4.5	0.102273	3.474	288	1.51351
D1-92	48.6	16.11	0.331481	4.71	0.0969136	2.761	299	1.375
D1-96	47.5	13.81	0.290737	4.63	0.0974737	3.231	290	1.325
F2-100	42.9	15.95	0.371795	4.23	0.0986014	1.206	262	1.54054
D3-81	55.5	16.73	0.301441	5.52	0.0994595	1.655	286	1.41463
E3-75	47.2	13.56	0.287288	4.86	0.102966	3.839	324	1.47368
D2-109	47.9	15.39	0.321294	4.56	0.0951983	3.437	345	1.5
D1-110	46.7	14.4	0.308351	5.2	0.111349	3.241	362	1.38462
F3-111	48.2	16.13	0.334647	4.74	0.0983402	3.634	294	1.375
E2-115	57.7	16.19	0.280589	5.86	0.10156	3.598	325	1.39024
F1-122	40.6	13.25	0.326355	3.84	0.0945813	3.238	298	1.5
D2-103	50.9	15.71	0.308644	5.26	0.10334	3.24	325	1.35
D2-105	51.6	15.31	0.296705	5.63	0.109109	3.923	323	1.4
E2-127	53.5	19.23	0.359439	4.78	0.0893458	1.409	252	1.45
E1-1	53.2	15.76	0.296241	4.63	0.0870301	2.649	283	1.34146
D1-2	49.6	15.6	0.314516	4.91	0.0989919	3.235	287	1.61111
D1-4	44.5	13.21	0.296854	4.9	0.110112	4.249	315	1.47368
E1-8	53.8	16.95	0.315056	5.58	0.103717	3.614	328	1.45
F2-9	54.7	16.65	0.304388	5.59	0.102194	3.661	321	1.39024
F3-17	51.3	13.94	0.271735	5.98	0.116569	3.294	422	1.375
F3-27	58.7	15.73	0.267973	5.61	0.0955707	3.581	306	1.4878
D1-29	49	15.99	0.326327	5.68	0.115918	4.432	362	1.41026
D3-36	44.3	15.13	0.341535	5.01	0.113093	2.79	322	1.30769
D2-54	48.2	15.27	0.316805	4.78	0.0991701	3.075	317	1.38462
D2-57	51	15.28	0.299608	5.26	0.103137	2.039	336	1.375
D3-38	45.5	15.81	0.347473	3.62	0.0795604	2.444	213	1.56757
D2-62	50.5	16.1	0.318812	4.58	0.0906931	2.427	312	1.51282
F2-63	50	15.62	0.3124	4.53	0.0906	2.693	255	1.425
D3-71	44.7	13.22	0.295749	4.87	0.108949	4.356	360	1.33333
D1-52	48	14.97	0.311875	4.75	0.0989583	2.344	287	1.3
D3-77	52	15.34	0.295	5.56	0.106923	3.366	308	1.31707
F2-81	45.2	15.05	0.332965	4.04	0.0893805	3.218	269	1.33333
F3-84	44.9	13.67	0.304454	4.9	0.109131	1.603	307	1.44737
F2-93	52.7	17.11	0.324668	5.67	0.10759	2.365	327	1.31707
D2-99	44.2	16.3	0.368778	5.25	0.118778	3.516	348	1.30769
F3-100	43.1	14.14	0.328074	3.83	0.0888631	3.005	266	1.39474
D3-102	50.3	15.46	0.307356	5.57	0.110736	3.295	295	1.35
D1-91	42.9	13.11	0.305594	4.26	0.0993007	3.214	258	1.31579
E2-87	52.5	16.26	0.309714	5.37	0.102286	3.955	330	1.31707
D2-124	43.7	12.22	0.279634	4.46	0.102059	2.284	267	1.51351
D3-108	58.3	17.26	0.296055	5.85	0.100343	3.805	303	1.43902
E1-98	49.8	15.1	0.303213	5.73	0.11506	4.861	345	1.375
D2-141	51.6	17.05	0.330426	5.54	0.107364	3	289	1.375
D1-126	47.6	16.14	0.339076	5.04	0.105882	3.308	348	1.38462
E2-150	55	19.08	0.346909	5.72	0.104	3.294	305	1.45
D1-152	55.1	16.68	0.302722	4.22	0.076588	1.438	237	1.39024
E2-154	50.6	15.32	0.302767	6.53	0.129051	3.377	405	1.325
E1-124	42.9	13.95	0.325175	4.05	0.0944056	1.704	258	1.39474
E1-126	49.9	15.2	0.304609	5.09	0.102004	3.1	311	1.325
D2-160	46.3	13.64	0.2946	5.04	0.108855	3.305	354	1.35897
F2-165	51.8	17.93	0.346139	5.1	0.0984556	3.249	300	1.425
E2-172	49	14.27	0.291224	5.78	0.117959	3.8	348	1.325
D3-161	47.9	13.45	0.280793	5.2	0.108559	4.281	338	1.41026
F2-173	57.1	15.77	0.276182	4.97	0.0870403	1.929	271	1.30233
E1-161	49.5	18.09	0.365455	4.79	0.0967677	3.037	284	1.375
E1-167	59.2	18.16	0.306757	5.26	0.0888514	2.664	286	1.41463
E1-169	57.3	15.6	0.272251	6.05	0.105585	4.968	345	1.41463
E2-176	51.1	16.18	0.316634	4.8	0.0939335	3.115	284	1.425
D3-180	51.5	15.52	0.301359	4.29	0.083301	0.875	241	1.34146
D3-177	48.1	16.99	0.353222	5.48	0.113929	4.167	329	1.3
F3-1	50.7	14.1	0.278107	4.42	0.0871795	2.534	236	1.48718
D2-4	48.1	14.63	0.304158	5.26	0.109356	3.003	325	1.38462
D1-9	45	16.17	0.359333	3.9	0.0866667	2.039	252	1.33333
E2-8	45.3	14.7	0.324503	3.93	0.086755	1.312	245	1.54054
E3-12	47	13.62	0.289787	4.64	0.0987234	3.319	283	1.35897
D2-29	48.6	15.15	0.311728	4.25	0.0874486	3.17	263	1.41026
F3-34	53.9	15.95	0.295918	4.84	0.0897959	2.837	283	1.5
D1-41	42.2	14.6	0.345972	3.83	0.0907583	2.504	226	1.39474
D2-59	46.2	15.92	0.344589	4.45	0.0963203	2.864	275	1.35897
F2-61	50.9	16.64	0.326916	5.63	0.110609	3.371	354	1.4
F1-63	51.7	18.94	0.366344	5	0.0967118	2.74	285	1.425
F1-66	52.3	16.37	0.313002	4.81	0.0919694	2.257	275	1.475
F3-67	45.4	15.02	0.330837	4.56	0.100441	3.755	305	1.28205
D2-74	47.6	15.51	0.32584	4.25	0.0892857	1.778	252	1.5
F2-77	46.3	13.09	0.282721	4.68	0.10108	2.874	314	1.35897
F1-82	45.6	14.83	0.325219	4.49	0.0984649	3.546	308	1.56757
D2-67	37.8	11.42	0.302116	3.04	0.0804233	1.374	208	1.38889
E3-75	45.9	13.67	0.297821	4.21	0.0917211	3.207	281	1.44737
D1-110	45.2	14.25	0.315265	4.58	0.101327	2.156	314	1.35897
F2-111	47.4	14.67	0.309494	4.65	0.0981013	3.05	257	1.41026
E3-85	44.7	14.36	0.321253	3.96	0.0885906	3.853	277	1.51351
D2-103	54.3	15.98	0.294291	5.26	0.0968692	4.371	303	1.31707
F2-123	55.6	16.06	0.288849	4.43	0.0796763	2.489	235	1.475
E3-130	45.05	14.93	0.331477	3.53	0.0783574	1.239	229.5	1.50711
E3-132	56.3	16.32	0.289876	5.53	0.0982238	3.361	327	1.41463
F1-135	49.3	16.54	0.335497	3.18	0.064503	1.319	199	1.375
D1-136	46.6	14.46	0.3103	4.78	0.102575	2.755	291	1.275
